# Supplementary material
Source: publisher site journal article supplement (https://www.spandidos-publications.com/2870/downloadSupplementary)
Supplement: Supplementary file 1 [file downloadSupplementary]

## Sheet: Sheet1
Table SIII. GO analysis of 386 trans-targets.
GOID	Description	Type	Count	Genes
GO:0000137	Golgi cis cisterna	cellular_component	9	GOLGA8M GOLGA6C GOLGA8H GOLGA8J GOLGA8K GOLGA2 GOLGA8R GOLGA8O GOLGA8N
GO:0032580	Golgi cisterna membrane	cellular_component	12	FUT3 GOLGA8R GOLGA8O GOLGA8H GOLGA8M FUT2 GOLGA8J GOLGA2 GOLGA6C RAB21 GOLGA8N GOLGA8K
GO:0000139	Golgi membrane	cellular_component	37	TMF1 ACER3 AP4S1 ARFIP2 UBIAD1 VPS53 GOLGA2 CHP1 GOLGA8R GOLGA8M MANEAL CHST6 GRM6 ST8SIA4 GOLGA8N GOLGA8K COPA ENTPD4 GOLGA8J SNAP29 ATF6 AP1S3 GALNT4 MGAT4A SCAMP1 RAB21 FUT3 GOLGA8O GOLGA8H ZDHHC3 FUT2 TMEM130 SLC35B4 DSEL GOLGA6C GBP4 GALNT15
GO:0005801	cis-Golgi network	cellular_component	10	GOLGA8N GOLGA8K GOLGA6C GOLGA2 HOOK3 GOLGA8J GOLGA8H GOLGA8M GOLGA8O GOLGA8R
GO:0031985	Golgi cisterna	cellular_component	12	GOLGA6C RAB21 GOLGA8N GOLGA8K GOLGA2 GOLGA8H GOLGA8M FUT2 GOLGA8J FUT3 GOLGA8O GOLGA8R
GO:0005794	Golgi apparatus	cellular_component	57	TMEM130 C17ORF75 HIP1 RAB27A TSNAX DSEL GOLGA6L10 SERPINB9 GOLGA8O GOLGA6L4 GALNT4 SNAP29 CLCC1 SGSM1 F2R KIF1C GOLGA2 CHP1 HOOK3 GOLGA8J ENTPD4 COPA GOLGA8N ST8SIA4 CHST6 MANEAL ACER3 AP4S1 RAB3B ARFIP2 SLC35B4 GALNT15 GBP4 GOLGA6C RUBCN GOLGA8H FUT3 SCAMP1 RAB21 MGAT4A AP1S3 ATF6 FUT2 ZDHHC3 LDLR AP3S2 GOLGA8M GOLGA8R SPPL3 VPS53 KIAA1324 GOLGA8K GRM6 NMT2 TMF1 UBIAD1 OPRM1
GO:0005795	Golgi stack	cellular_component	12	GOLGA2 RAB21 FUT3 GOLGA8R GOLGA8O GOLGA8H GOLGA8M GOLGA6C GOLGA8N GOLGA8K FUT2 GOLGA8J
GO:0031090	organelle membrane	cellular_component	94	AP5B1 PDE6A LYRM7 GALNT15 SCAMP1 MGAT4A ATF6 MRPL30 MBOAT1 GPI CYB5R3 AP3S2 TIGAR SGPP2 SFXN1 VPS53 CAMK2G GOLGA8M GRM6 KIAA1324 LETM1 ERAP2 TSPAN14 CLN8 ACSL6 CYP51A1 TMEM130 DSEL BORCS7 HIP1 SNAP29 PIGX SGSM1 TBC1D24 ST8SIA4 GOLGA8J SVOP CYP8B1 ACER3 PIGC PLEKHB2 PIGR ECE1 CPT1A BRIP1 PGAM5 SLC35B4 GBP4 GOLGA6C SPTLC2 PNPT1 RAB21 AP1S3 DTX3L GOLGA8H FUT3 ZDHHC3 LDLR FUT2 SPPL3 GOLGA8R GOLGA8K A…
GO:0019674	NAD metabolic process	biological_process	5	TIGAR NMNAT1 QPRT PGM2L1 GPI
GO:0008089	anterograde axonal transport	biological_process	5	AP3S2 KIF3A KIF1C TERF2 RAB21
GO:0036336	dendritic cell migration	biological_process	4	NLRP12 CCR6 CCL5 HMGB1
GO:0012505	endomembrane system	cellular_component	111	APOL1 VPS53 GOLGA8M CAMK2G OPRM1 TSPAN14 NMT2 UBE2G2 RUBCN CYB5R3 MBOAT1 KPNA6 MGAT4A HMGB1 ST8SIA4 KIF1C PIGR PLEKHB2 BRIP1 ECE1 CYP8B1 ACER3 TSNAX C17ORF75 JAK3 ACSL6 CBX5 SGSM1 SNAP29 KDELC2 PIGX GOLGA6L10 SPPL3 GOLGA8R ICA1L RNF41 LYZ SLC35B4 SEMA4F ZDHHC3 FUT2 AP1S3 DTX3L GOLGA8H CHST6 RPL36A ATG14 GOLGA8N COPA ENTPD4 HOOK3 TOR1AIP2 ARFIP2 LRAT RAB27A FBXO6 LILRB3 ITGAX REEP3 LSG1 GOLGA8O GR…
GO:1901135	carbohydrate derivative metabolic process	biological_process	35	FBXO6 JAK3 ACSL6 DSEL PIGX GALNT4 KDELC2 POFUT1 UGGT1 GOLGA2 CHP1 AK1 PDP2 ENTPD4 GLTP CHST6 ST8SIA4 PIGC ISPD APOBEC3A PGM2L1 GALNT15 GAMT IDS FUT3 GK5 MGAT4A FUT2 PDE4C TIGAR GPI AK3 UBE2G2 NMNAT1 PIPOX
GO:0007030	Golgi organization	biological_process	9	GOLGA2 GOLGA8H GOLGA8M GOLGA8O GOLGA8R GOLGA8N GOLGA8K GOLGA6C GOLGA8J
GO:0051225	spindle assembly	biological_process	9	GOLGA2 GOLGA6C GOLGA8N GOLGA8K GOLGA8R GOLGA8O GOLGA8H GOLGA8M GOLGA8J
GO:0006486	protein glycosylation	biological_process	13	GALNT15 ST8SIA4 CHP1 GOLGA2 FUT2 UGGT1 FUT3 UBE2G2 ISPD POFUT1 MGAT4A KDELC2 GALNT4
GO:0043413	macromolecule glycosylation	biological_process	13	ST8SIA4 GALNT15 CHP1 GOLGA2 FUT2 UGGT1 POFUT1 MGAT4A KDELC2 GALNT4 UBE2G2 ISPD FUT3
GO:0006914	autophagy	biological_process	19	HMGB1 TRIM65 RNF41 MEFV SNAP29 CD84 MTMR9 ABL2 TIGAR SOGA3 PGAM5 GOLGA2 SPTLC2 LIX1L KIAA1324 ATG14 RUBCN ATP6V0A2 WDR45
GO:1904115	axon cytoplasm	cellular_component	5	TERF2 RAB21 KIF1C AP3S2 KIF3A
GO:0098930	axonal transport	biological_process	5	AP3S2 KIF3A KIF1C RAB21 TERF2
GO:0009100	glycoprotein metabolic process	biological_process	17	GOLGA2 FBXO6 JAK3 CHP1 ST8SIA4 IDS DSEL GALNT15 KDELC2 GALNT4 POFUT1 MGAT4A ISPD UBE2G2 FUT3 UGGT1 FUT2
GO:0070085	glycosylation	biological_process	13	GALNT15 ST8SIA4 GOLGA2 CHP1 UGGT1 FUT2 ISPD UBE2G2 FUT3 KDELC2 GALNT4 POFUT1 MGAT4A
GO:0009101	glycoprotein biosynthetic process	biological_process	15	DSEL ST8SIA4 GALNT15 GOLGA2 JAK3 CHP1 FUT2 UGGT1 KDELC2 GALNT4 POFUT1 MGAT4A FUT3 UBE2G2 ISPD
GO:0005737	cytoplasm	cellular_component	245	LETM1 INMT RNF14 CLN8 ARNTL2 ALDH1B1 DGKH GRM6 KIAA1324 PTK6 GK5 TIGAR AP3S2 KIF18B ZNF106 SHROOM1 RLIM MEFV MTFMT BIVM DESI1 POFUT1 BCDIN3D GOLGA6L10 SGTB UGGT1 ARHGAP45 TMEM130 BORCS7 HIP1 ZNF655 IKZF3 SLC6A4 KIF3A GSDMB LIMS1 PDE4C CAMK1D TAF8 TPM3 REL GOLGA6C PNPT1 APOBEC3A DIS3L GDPD1 DNAJC21 GRK3 RAB3B GAS2L3 TRIM45 GALNT4 GOLGA6L4 F2R SNTB2 IDO1 CD109 NUAK2 METTL21A NMT2 TSPAN14 OPRM1 SFXN…
GO:0097352	autophagosome maturation	biological_process	4	ATG14 RUBCN SNAP29 LIX1L
GO:0009056	catabolic process	biological_process	66	MTMR9 CPT1A ECE1 MEFV ACER3 LIX1L NKD1 QPRT DBT SGTB UGGT1 CD84 SNAP29 DCP1A CYP51A1 CLN8 ALDH1B1 ERAP2 UBE2G2 RNF14 KIAA1324 GPI TIGAR TRIM58 FBXL20 TRIM65 HMGB1 GK5 RUBCN PGM2L1 RLIM ABL2 APOBEC3A DIS3L GDPD1 AKR1D1 RPL36A ATP6V0A2 ATG14 ENTPD4 CHP1 GOLGA2 SMG1 SCARF1 MDM4 FBXO6 IDO1 PEX13 PIPOX DFFA NMNAT1 FBXL18 RNF41 TMF1 WDR45 PPP1R3B SOGA3 LDLR PDE4C FUT2 DTX3L PLEKHG5 IDS SPTLC2 PNPT1 PGA…
GO:0016409	palmitoyltransferase activity	molecular_function	4	SPTLC2 ZDHHC3 LRAT CPT1A
GO:0008017	microtubule binding	molecular_function	11	KIF18B DPYSL5 FMN1 KIF3A FAM161A GAS2L3 KIF1C SKA1 HOOK3 CHP1 GOLGA2
GO:0017022	myosin binding	molecular_function	5	RAB27A SHROOM1 RAB3B SLC6A4 AXL
GO:0008088	axo-dendritic transport	biological_process	5	AP3S2 KIF3A RAB21 TERF2 KIF1C
GO:0016740	transferase activity	molecular_function	73	TERF2 POFUT1 KDELC2 BCDIN3D ZNF451 UGGT1 TRMT2B QPRT DBT JAK3 DSEL PIGC RBBP5 CCL5 MTFMT CPT1A TADA3 AK1 ST8SIA4 POLH GK5 FBXL20 MGAT4A PTK6 MBOAT1 TIGAR TRIM58 RLIM PGM2L1 NOL9 GALNT15 GAMT RUBCN UBE2G2 NMT2 RNF14 METTL21A INMT RNF157 CAMK2G DGKH XIAP GALNT4 F2R FBXO6 NUAK2 ISPD LRAT GRK3 SPRED1 ABL2 CHP1 GOLGA2 SMG1 ATG14 CHST6 DTX3L FUT3 FUT2 CAMK1D EEF2K MEAF6 ZDHHC3 AXL SPTLC2 PNPT1 RNF41 NM…
GO:0044275	cellular carbohydrate catabolic process	biological_process	4	PGM2L1 GK5 PPP1R3B TIGAR
GO:0030117	membrane coat	cellular_component	6	AP5B1 HIP1 COPA AP4S1 AP3S2 AP1S3
GO:0030119	AP-type membrane coat adaptor complex	cellular_component	4	AP5B1 HIP1 AP4S1 AP3S2
GO:0010506	regulation of autophagy	biological_process	13	GOLGA2 SOGA3 ATP6V0A2 RUBCN SPTLC2 KIAA1324 TRIM65 HMGB1 MEFV RNF41 ABL2 MTMR9 TIGAR
GO:0006643	membrane lipid metabolic process	biological_process	10	FUT3 PIGX ACER3 PIGC CLN8 ST8SIA4 GLTP SPTLC2 AGMO SGPP2
GO:0007017	microtubule-based process	biological_process	24	PEX13 GOLGA6C GOLGA8H SKA1 GOLGA8O TERF2 RAB21 KIF18B TUBD1 AP3S2 TRIM58 GAS2L3 GOLGA8M KIF1C GOLGA8R GOLGA2 CHP1 HOOK3 CEP68 GOLGA8J GOLGA8N GOLGA8K KIF3A CLUAP1
GO:0006066	alcohol metabolic process	biological_process	14	LDLR CYB5R3 CLN8 SCARF1 SGPP2 ALDH1B1 LRAT ACER3 GDPD1 GK5 AKR1D1 APOL1 SPTLC2 CYP51A1
GO:0070231	T cell apoptotic process	biological_process	4	IDO1 DFFA CCL5 JAK3
GO:0061912	selective autophagy	biological_process	4	ATG14 TIGAR SPTLC2 RNF41
GO:0016757	transferase activity, transferring glycosyl groups	molecular_function	12	FUT3 PIGC DTX3L POFUT1 MGAT4A KDELC2 GALNT4 UGGT1 FUT2 QPRT GALNT15 ST8SIA4
GO:0032655	regulation of interleukin-12 production	biological_process	5	HMGB1 IDO1 MEFV IRF1 JAK3
GO:0044281	small molecule metabolic process	biological_process	50	SLC25A15 DSEL CYP51A1 PEX13 IDO1 ACSL6 UGGT1 DBT QPRT SCARF1 POFUT1 PDP2 ENTPD4 CHST6 AKR1D1 MRI1 CHP1 AK1 CPT1A ACER3 GDPD1 GCLM LRAT APOBEC3A CYP8B1 SPTLC2 GAMT IDS SLC35B4 PNPO PGM2L1 ME2 SGPP2 FUT2 PDE4C LDLR TIGAR GPI CYB5R3 GK5 AGMO APOL1 AK3 PPP1R3B SFXN1 ALDH1B1 PIPOX UBIAD1 CLN8 NMNAT1
GO:0042157	lipoprotein metabolic process	biological_process	7	NMT2 PIGX PIGC APOL1 ZDHHC3 LDLR WDR45
GO:0032615	interleukin-12 production	biological_process	5	HMGB1 IDO1 MEFV JAK3 IRF1
GO:0016125	sterol metabolic process	biological_process	8	APOL1 SCARF1 AKR1D1 CLN8 CYB5R3 LDLR CYP51A1 CYP8B1
GO:0043231	intracellular membrane-bounded organelle	cellular_component	234	RAB27A PEX13 MTG2 ZBP1 RPL36A COPA SMG1 TOR1AIP2 ARFIP2 IDS LYZ SPATA5 ARGFX SLC35B4 SEMA4F FUT2 AP1S3 DTX3L FOXK1 RBM3 AK3 SPPL3 PPP1R3B FAM9B PIPOX DFFA NMNAT1 FBXL18 RNF41 TSNAX ACSL6 ZNF451 KDELC2 MOB1A PIGX ST8SIA4 KIF1C PIGR CPT1A ECE1 BRIP1 ACER3 RUBCN ZNF490 PNPO C4ORF19 IRF1 ZRANB3 CYB5R3 KPNA6 HMGB1 LSM11 ANKRD12 APOL1 CAMK2G GOLGA8M TONSL HOMEZ ZNF426 UBE2G2 TRIM52 SPATS2L DCTN5 XPNPEP…
GO:0005876	spindle microtubule	cellular_component	4	SKA1 FAM161A KIF18B KIF3A
GO:0046164	alcohol catabolic process	biological_process	4	GK5 AKR1D1 SCARF1 ALDH1B1
GO:2000107	negative regulation of leukocyte apoptotic process	biological_process	4	IDO1 JAK3 AXL CCL5
GO:0071887	leukocyte apoptotic process	biological_process	6	CCL5 JAK3 DFFA AXL TRAF3IP2 IDO1
GO:0030173	integral component of Golgi membrane	cellular_component	4	ACER3 SLC35B4 UBIAD1 ENTPD4
GO:0001786	phosphatidylserine binding	molecular_function	4	AXL GSDMA HMGB1 GSDMB
GO:0010256	endomembrane system organization	biological_process	15	GOLGA8H TMF1 GOLGA8O TOR1AIP2 REEP3 F2R HOOK3 GOLGA2 GOLGA8M GOLGA8R RAB27A GOLGA6C GOLGA8K GOLGA8N GOLGA8J
GO:0061630	ubiquitin protein ligase activity	molecular_function	10	XIAP FBXL18 GOLGA2 FBXO6 RNF41 RLIM RNF14 RNF157 TRIM58 UBOX5
GO:0030705	cytoskeleton-dependent intracellular transport	biological_process	8	KIF1C CLUAP1 HOOK3 TERF2 RAB21 KIF3A AP3S2 TRIM58
GO:0007051	spindle organization	biological_process	9	GOLGA2 GOLGA8H GOLGA8M GOLGA8R GOLGA8O GOLGA6C GOLGA8N GOLGA8K GOLGA8J
GO:0005829	cytosol	cellular_component	111	RNF14 INMT XIAP KIF18B ZNF106 ARHGAP26 GPI TIGAR POLH PTK6 ATF6 SMAD9 RLIM MTMR9 MEFV DCAF7 RBMS2 AK1 SGTB BCDIN3D HIP1 BORCS7 ARHGAP45 SLC6A4 IKZF3 TMF1 WDR45 KIF3A PDE4C EEF2K GSDMB LIMS1 RAB21 PNPT1 REL GBP4 TPM3 SPRED1 GRK3 RAB3B DIS3L IFIT3 GCLM TRIM45 STRIP2 GLTP CHP1 LPP SERPINB9 DCTN5 SPATS2L IDO1 NMT2 UBE2G2 ANKRD12 CAMK2G HOMEZ VPS53 DPYSL5 KPNA6 CYB5R3 RASGRP4 TRIM65 SKA1 FBXL20 CIAO1 …
GO:0008203	cholesterol metabolic process	biological_process	7	CYP51A1 APOL1 CLN8 CYB5R3 SCARF1 AKR1D1 LDLR
GO:0008081	phosphoric diester hydrolase activity	molecular_function	7	PLCXD1 PDE4C PDE6A ABL2 RASGRP4 GDPD1 CCL5
GO:0010507	negative regulation of autophagy	biological_process	5	TIGAR GOLGA2 RUBCN MTMR9 RNF41
GO:0003824	catalytic activity	molecular_function	154	SPATA5 IDS LYZ AXL FUT2 ZDHHC3 MEAF6 DTX3L ISG20L2 PLCXD1 AK3 SMYD4 PPP1R3B SPPL3 PIPOX DFFA PGPEP1 RNF41 NMNAT1 DTD2 FBXL18 RAB27A GIPR FBXO6 LSG1 MTG2 ENTPD4 AKR1D1 CHST6 ATG14 ZBP1 MRI1 PPIL6 SMG1 ABL2 TOR1AIP2 ISPD LRAT PDE6A CCL22 RUBCN GAMT ZRANB3 PGM2L1 PNPO NOL9 DPYSL5 CYB5R3 MBOAT1 TRIM58 RASGRP4 HMGB1 MGAT4A FBXL20 PHACTR4 CAMK2G NRIP3 RNF157 NMT2 UBE2G2 METTL21A TSNAX DCP1A TBC1D15 ACS…
GO:0031228	intrinsic component of Golgi membrane	cellular_component	4	ACER3 UBIAD1 ENTPD4 SLC35B4
GO:0006497	protein lipidation	biological_process	5	PIGX PIGC NMT2 ZDHHC3 WDR45
GO:0043227	membrane-bounded organelle	cellular_component	259	LRAT THAP5 DSG3 HOOK3 ANKRD16 MRI1 GOLGA8N ATG14 CHST6 CEP68 ENTPD4 ZNF514 MDM4 GOLGA8O PNMA2 NUDC LSG1 REEP3 LILRB3 FBXO6 SUGP2 DCAF10 UBN2 GOLGA8R ISG20L2 PLEKHG5 GOLGA8H MEAF6 ZDHHC3 AXL CYP8B1 PPP1R12B FMN1 PLEKHB2 ZNF652 PDP2 SNAP29 GOLGA6L10 CBX5 DBT QPRT TUBD1 SGSM1 FBLIM1 JAK3 DCP1A C17ORF75 METTL21A NMT2 TSPAN14 OPRM1 SFXN1 VPS53 RRP7A MGAT4A TRIM65 ZNF91 MBOAT1 NOL9 AP5B1 PDE6A GAMT APO…
GO:0009108	coenzyme biosynthetic process	biological_process	7	NMNAT1 ACSL6 PNPO IDO1 QPRT UBIAD1 PDP2
GO:0042886	amide transport	biological_process	52	ZDHHC3 DTX3L AP1S3 RAB21 TLR10 BTN3A2 PIPOX ZMAT3 KIF3A F2R LSG1 RAB27A PEX13 GIPR ARFIP2 RAB3B AP4S1 COPA ATP6V0A2 GLTP RPL36A HOOK3 GOLGA2 SMG1 CHP1 KPNA6 AP3S2 GPI HMGB1 SCAMP1 AP5B1 OPRM1 CLUAP1 UBE2G2 SLC14A2 CAMK2G VPS53 SGSM1 SGTB SNAP29 NLRP12 TERF2 C17ORF75 HIP1 TSNAX CYP51A1 TBC1D15 RUNDC1 CPT1A AKAP5 TRAF3IP2 CCL5
GO:0005874	microtubule	cellular_component	14	KIF3A GAS2L3 KIF1C GOLGA2 HOOK3 SHROOM1 REEP3 SNTB2 KIF18B FAM161A TUBD1 NUDC MEFV SKA1
GO:0016758	transferase activity, transferring hexosyl groups	molecular_function	9	MGAT4A POFUT1 GALNT4 KDELC2 FUT3 PIGC UGGT1 FUT2 GALNT15
GO:0008092	cytoskeletal protein binding	molecular_function	26	PSTPIP2 AXL DCP1A TPM3 FBLIM1 SHROOM1 HIP1 RAB27A SKA1 KIF18B DPYSL5 SNTB2 FAM161A GAS2L3 KIF1C HOOK3 GOLGA2 CHP1 PHACTR4 KIF3A MEFV RAB3B SLC6A4 ABL2 FMN1 OPRM1
GO:0090305	nucleic acid phosphodiester bond hydrolysis	biological_process	12	HMGB1 DIS3L NMNAT1 ISG20L2 TERF2 DFFA DCP1A ZRANB3 NOL9 GTF2H5 PNPT1 TSNAX
GO:0042158	lipoprotein biosynthetic process	biological_process	5	ZDHHC3 WDR45 PIGC PIGX NMT2
GO:0006639	acylglycerol metabolic process	biological_process	6	LDLR ATG14 CPT1A AGMO DGKH GK5
GO:0016236	macroautophagy	biological_process	11	RNF41 SNAP29 TIGAR PGAM5 KIAA1324 SPTLC2 LIX1L WDR45 ATG14 RUBCN ATP6V0A2
GO:1903008	organelle disassembly	biological_process	5	WDR45 TIGAR ATG14 GOLGA2 RNF41
GO:0006638	neutral lipid metabolic process	biological_process	6	LDLR ATG14 AGMO CPT1A DGKH GK5
GO:0051865	protein autoubiquitination	biological_process	4	TRIM58 RNF157 DTX3L RNF41
GO:0015031	protein transport	biological_process	50	HIP1 C17ORF75 TSNAX RAB27A PEX13 CYP51A1 RUNDC1 TBC1D15 GIPR F2R SGSM1 LSG1 SGTB SNAP29 NLRP12 TERF2 COPA RPL36A ATP6V0A2 HOOK3 CHP1 SMG1 GOLGA2 CPT1A ARFIP2 RAB3B AP4S1 AKAP5 TRAF3IP2 CCL5 TLR10 AP5B1 KPNA6 AP3S2 ZDHHC3 GPI DTX3L HMGB1 AP1S3 SCAMP1 RAB21 ZMAT3 KIF3A CAMK2G VPS53 BTN3A2 PIPOX OPRM1 CLUAP1 UBE2G2
GO:0006641	triglyceride metabolic process	biological_process	5	AGMO CPT1A GK5 LDLR ATG14
GO:0042578	phosphoric ester hydrolase activity	molecular_function	18	PGAM5 PDE6A RASGRP4 SGPP2 PDE4C TIGAR PPP1R3B CAMK2G CHP1 PDP2 PLCXD1 PHACTR4 GDPD1 CCL5 SPRED1 PPP1R12B MTMR9 ABL2
GO:0071702	organic substance transport	biological_process	65	CCL5 TRAF3IP2 AKAP5 SLC4A8 CPT1A RUNDC1 TBC1D15 CYP51A1 TSNAX HIP1 C17ORF75 NLRP12 TERF2 SNAP29 SGTB SGSM1 SFXN1 VPS53 CAMK2G APOL1 SLC14A2 UBE2G2 CLUAP1 CLN8 OPRM1 AP5B1 SCAMP1 HMGB1 GPI AP3S2 KPNA6 HOOK3 CHP1 SMG1 GOLGA2 GLTP ATP6V0A2 RPL36A COPA LRAT SLC26A4 AP4S1 ARFIP2 RAB3B GIPR PEX13 RAB27A SLC25A15 LSG1 F2R KIF3A ZMAT3 SLC43A2 TMF1 BTN3A2 PIPOX SLC6A4 SLC35B4 TLR10 PNPT1 RAB21 AP1S3 DTX3L…
GO:0000422	autophagy of mitochondrion	biological_process	4	RNF41 TIGAR WDR45 ATG14
GO:0009583	detection of light stimulus	biological_process	4	CABP4 NMT2 GRM6 PDE6A
GO:0005793	endoplasmic reticulum-Golgi intermediate compartment	cellular_component	6	SPPL3 CLN8 GOLGA2 CHP1 HMGB1 UGGT1
GO:0015631	tubulin binding	molecular_function	11	KIF18B DPYSL5 FMN1 FAM161A SKA1 KIF3A GAS2L3 KIF1C GOLGA2 CHP1 HOOK3
GO:0015833	peptide transport	biological_process	50	RUNDC1 TBC1D15 CYP51A1 TSNAX HIP1 C17ORF75 NLRP12 TERF2 SNAP29 SGTB SGSM1 CCL5 TRAF3IP2 AKAP5 CPT1A AP5B1 SCAMP1 HMGB1 GPI AP3S2 KPNA6 VPS53 CAMK2G UBE2G2 CLUAP1 OPRM1 GIPR PEX13 RAB27A LSG1 F2R HOOK3 CHP1 SMG1 GOLGA2 ATP6V0A2 RPL36A COPA AP4S1 ARFIP2 RAB3B TLR10 RAB21 AP1S3 DTX3L ZDHHC3 KIF3A ZMAT3 BTN3A2 PIPOX
GO:0006672	ceramide metabolic process	biological_process	5	SPTLC2 FUT3 ACER3 CLN8 ST8SIA4
GO:0002695	negative regulation of leukocyte activation	biological_process	8	PAG1 LDLR CD84 JAK3 HMGB1 IDO1 IRF1 AXL
GO:0016788	hydrolase activity, acting on ester bonds	molecular_function	28	TSNAX TERF2 PDP2 CHP1 MTMR9 ABL2 PPP1R12B SPRED1 CCL5 GDPD1 DIS3L PDE6A IDS PNPT1 PGAM5 ZRANB3 TIGAR SGPP2 PDE4C ISG20L2 RASGRP4 HMGB1 PHACTR4 PLCXD1 PPP1R3B CAMK2G DFFA DTD2
GO:0043229	intracellular organelle	cellular_component	260	GOLGA8R DCAF10 UBN2 PLEKHG5 GOLGA8H ISG20L2 MEAF6 ZDHHC3 ANKRD16 MRI1 HOOK3 CEP68 ENTPD4 ATG14 CHST6 GOLGA8N THAP5 LRAT SUGP2 FBXO6 LILRB3 GOLGA8O PNMA2 MDM4 ZNF514 LSG1 REEP3 NUDC RRP7A VPS53 SFXN1 NMT2 METTL21A OPRM1 TSPAN14 PSTPIP2 AP5B1 NOL9 GAMT TRIM65 ZNF91 MGAT4A FAM161A MBOAT1 PDP2 CYP8B1 ZNF652 FMN1 PPP1R12B PLEKHB2 DCP1A JAK3 FBLIM1 C17ORF75 GOLGA6L10 SNAP29 SGSM1 TUBD1 CBX5 DBT ZMAT3 K…
GO:0006665	sphingolipid metabolic process	biological_process	7	FUT3 ACER3 SPTLC2 SGPP2 ST8SIA4 CLN8 GLTP
GO:0000226	microtubule cytoskeleton organization	biological_process	17	GOLGA8R GOLGA8M GAS2L3 HOOK3 GOLGA2 CHP1 CEP68 GOLGA8J KIF3A GOLGA8N GOLGA8K GOLGA6C SKA1 GOLGA8O GOLGA8H KIF18B TUBD1
GO:0019637	organophosphate metabolic process	biological_process	27	PIGX QPRT IDO1 ACSL6 GDPD1 PIGC MTMR9 AK1 SMG1 PDP2 ENTPD4 ATG14 GK5 PDE4C TIGAR LDLR GPI MBOAT1 PNPO PGM2L1 SPTLC2 RUBCN NMNAT1 PIPOX CLN8 DGKH AK3
GO:0007601	visual perception	biological_process	8	ATF6 LRAT RD3 CABP4 GRM6 FAM161A PDE6A CRX
GO:0009132	nucleoside diphosphate metabolic process	biological_process	6	PGM2L1 AK1 GPI TIGAR ENTPD4 AK3
GO:0000209	protein polyubiquitination	biological_process	11	UBOX5 TRIM58 RNF14 RNF41 DTX3L UBE2G2 FBXL18 FBXL20 RLIM FBXO6 XIAP
GO:0045184	establishment of protein localization	biological_process	51	VPS53 CAMK2G OPRM1 UBE2G2 CLUAP1 AP5B1 GPI AP3S2 KPNA6 SCAMP1 HMGB1 CPT1A CCL5 TRAF3IP2 AKAP5 TSNAX C17ORF75 HIP1 RUNDC1 TBC1D15 CYP51A1 SGTB SGSM1 NLRP12 TERF2 SNAP29 KIF3A ZMAT3 BTN3A2 PIPOX TLR10 ZDHHC3 LIMS1 RAB21 AP1S3 DTX3L RPL36A ATP6V0A2 COPA HOOK3 SMG1 GOLGA2 CHP1 ARFIP2 RAB3B AP4S1 RAB27A GIPR PEX13 LSG1 F2R
GO:0072384	organelle transport along microtubule	biological_process	4	TRIM58 AP3S2 KIF3A KIF1C
GO:0050953	sensory perception of light stimulus	biological_process	8	CABP4 RD3 ATF6 LRAT PDE6A CRX FAM161A GRM6
GO:0030148	sphingolipid biosynthetic process	biological_process	5	ST8SIA4 CLN8 ACER3 SGPP2 SPTLC2
GO:0046031	ADP metabolic process	biological_process	5	AK3 PGM2L1 GPI AK1 TIGAR
GO:0032526	response to retinoic acid	biological_process	5	PTK6 LRAT ABL2 SLC6A4 MICB
GO:0019787	ubiquitin-like protein transferase activity	molecular_function	14	RLIM XIAP GOLGA2 FBXO6 UBE2G2 RNF41 DTX3L RNF14 FBXL20 FBXL18 UBOX5 ZNF451 RNF157 TRIM58
GO:0010508	positive regulation of autophagy	biological_process	5	MEFV KIAA1324 SPTLC2 TRIM65 HMGB1
GO:0006400	tRNA modification	biological_process	4	BCDIN3D MTFMT TRMT2B ANKRD16
GO:0008277	regulation of G protein-coupled receptor signaling pathway	biological_process	6	PDE6A OPRM1 RASGRP4 NMT2 GIPR CCL5
GO:0031461	cullin-RING ubiquitin ligase complex	cellular_component	6	DCAF16 FBXL20 FBXL18 FBXO6 DCAF7 DCAF10
GO:0006282	regulation of DNA repair	biological_process	5	TERF2 TIGAR DTX3L POLH HMGB1
GO:0003727	single-stranded RNA binding	molecular_function	4	L1TD1 RBMS2 RBM3 PNPT1
GO:0005783	endoplasmic reticulum	cellular_component	46	PIGX POFUT1 KDELC2 CLCC1 UGGT1 REEP3 LSG1 CYP51A1 ACSL6 FBXO6 GDPD1 ACER3 PIGC CYP8B1 LRAT P3H4 TOR1AIP2 KIF1C CHP1 COPA RPL36A ATG14 MGAT4A RAB21 ATF6 SGPP2 CYB5R3 MBOAT1 SEMA4F ZDHHC3 SLC35B4 SPTLC2 PNPT1 RNF41 UBE2G2 TMF1 ERAP2 UBIAD1 CLN8 TSPAN14 OPRM1 CAMK2G SPPL3 APOL1 AGMO GRM6
GO:1901981	phosphatidylinositol phosphate binding	molecular_function	6	GSDMB PLEKHB2 WDR45 HIP1 ARFIP2 GSDMA
GO:1903725	regulation of phospholipid metabolic process	biological_process	4	ATG14 RUBCN LDLR MTMR9
GO:0097194	execution phase of apoptosis	biological_process	4	NMNAT1 FZD3 HMGB1 DFFA
GO:0050866	negative regulation of cell activation	biological_process	8	JAK3 IRF1 AXL HMGB1 IDO1 PAG1 LDLR CD84
GO:0051053	negative regulation of DNA metabolic process	biological_process	5	NMNAT1 TERF2 ZRANB3 DFFA ZNF91
GO:0072341	modified amino acid binding	molecular_function	4	AXL GSDMA HMGB1 GSDMB
GO:0004842	ubiquitin-protein transferase activity	molecular_function	13	XIAP GOLGA2 FBXO6 RLIM FBXL20 FBXL18 UBE2G2 RNF41 DTX3L RNF14 RNF157 TRIM58 UBOX5
GO:0032838	plasma membrane bounded cell projection cytoplasm	cellular_component	7	AP3S2 KIF3A OPRM1 ATG14 KIF1C TERF2 RAB21
GO:0004527	exonuclease activity	molecular_function	4	DIS3L PNPT1 ISG20L2 TERF2
GO:0015108	chloride transmembrane transporter activity	molecular_function	5	SLC26A4 SLC12A6 APOL1 SLC6A4 CLCC1
GO:0005776	autophagosome	cellular_component	4	ENTPD4 MEFV ATG14 SNAP29
GO:1902476	chloride transmembrane transport	biological_process	5	SLC12A6 SLC26A4 APOL1 SLC6A4 CLCC1
GO:2001022	positive regulation of response to DNA damage stimulus	biological_process	4	TIGAR HMGB1 DTX3L SPRED1
GO:0008194	UDP-glycosyltransferase activity	molecular_function	6	GALNT4 KDELC2 MGAT4A PIGC GALNT15 UGGT1
GO:1990542	mitochondrial transmembrane transport	biological_process	4	LETM1 CPT1A PNPT1 SLC25A15
GO:0004518	nuclease activity	molecular_function	8	TERF2 ISG20L2 DIS3L HMGB1 ZRANB3 TSNAX PNPT1 DFFA
GO:0050868	negative regulation of T cell activation	biological_process	5	PAG1 JAK3 IRF1 HMGB1 IDO1
GO:0006493	protein O-linked glycosylation	biological_process	5	KDELC2 GALNT4 POFUT1 GALNT15 ISPD
GO:0002262	myeloid cell homeostasis	biological_process	6	GPI TRIM58 HMGB1 AXL SFXN1 JAK3
GO:0046632	alpha-beta T cell differentiation	biological_process	4	JAK3 HMGB1 IRF1 TCF7
GO:0002690	positive regulation of leukocyte chemotaxis	biological_process	4	CAMK1D HMGB1 CCL5 CCR6
GO:0015297	antiporter activity	molecular_function	4	SLC4A8 SLC26A4 CHP1 LETM1
GO:0046907	intracellular transport	biological_process	42	ARFIP2 RAB3B CPT1A AKAP5 AP4S1 COPA ATG14 RPL36A KIF1C HOOK3 GOLGA2 SMG1 CHP1 CD84 LSG1 SGSM1 SGTB TERF2 SNAP29 C17ORF75 HIP1 RAB27A DCTN5 PEX13 TBC1D15 RUNDC1 PIPOX UBE2G2 CLUAP1 KIF3A VPS53 KPNA6 ZDHHC3 LDLR TRIM58 AP3S2 DTX3L HEATR5A RAB21 FBXL20 AP1S3 AP5B1
GO:0033036	macromolecule localization	biological_process	68	AP5B1 HMGB1 SCAMP1 KPNA6 AP3S2 GPI TONSL CAMK2G VPS53 APOL1 CLUAP1 UBE2G2 OPRM1 TSPAN14 CLN8 CYP51A1 DCP1A RUNDC1 TBC1D15 C17ORF75 HIP1 TSNAX SNAP29 TERF2 NLRP12 SGSM1 SGTB AKAP5 TRAF3IP2 CCL5 CPT1A PIGR TAF8 PNPT1 TLR10 DTX3L AP1S3 RAB21 HEATR5A LIMS1 LDLR ZDHHC3 ZMAT3 KIF3A WDR45 TMF1 PIPOX BTN3A2 PEX13 GIPR RAB27A F2R LSG1 SMG1 GOLGA2 CHP1 HOOK3 COPA CEP68 RPL36A ATP6V0A2 GLTP AP4S1 SLC26A4 LR…
GO:0019318	hexose metabolic process	biological_process	8	TIGAR GPI CPT1A FUT2 PGM2L1 POFUT1 SLC35B4 PPP1R3B
GO:0008104	protein localization	biological_process	61	KPNA6 GPI AP3S2 HMGB1 SCAMP1 AP5B1 TSPAN14 OPRM1 UBE2G2 CLUAP1 CAMK2G TONSL VPS53 SGSM1 SGTB NLRP12 TERF2 SNAP29 HIP1 C17ORF75 TSNAX DCP1A CYP51A1 TBC1D15 RUNDC1 CPT1A PIGR TRAF3IP2 AKAP5 CCL5 ZDHHC3 LIMS1 DTX3L HEATR5A RAB21 AP1S3 TLR10 TAF8 BTN3A2 PIPOX ZMAT3 WDR45 KIF3A LSG1 F2R RAB27A PEX13 GIPR ARFIP2 RAB3B TOR1AIP2 AP4S1 SLC26A4 CEP68 COPA RPL36A ATP6V0A2 HOOK3 CHP1 GOLGA2 SMG1
GO:0005996	monosaccharide metabolic process	biological_process	9	SLC35B4 PPP1R3B PGM2L1 FUT2 CPT1A GPI CYB5R3 TIGAR POFUT1
GO:0032392	DNA geometric change	biological_process	4	BRIP1 ZRANB3 HMGB1 GTF2H5
GO:0046486	glycerolipid metabolic process	biological_process	13	CPT1A LDLR MTMR9 MBOAT1 PIGX GDPD1 PIGC GK5 AGMO RUBCN ATG14 DGKH SMG1
GO:0030659	cytoplasmic vesicle membrane	cellular_component	22	RAB27A HIP1 ITGAX LILRB3 CD109 LDLR AP3S2 SCARF1 SGSM1 SNTB2 SNAP29 AP1S3 RAB21 SCAMP1 ATP6V0A2 COPA TBC1D24 CAMK2G PIGR TSPAN14 RAB3B SVOP
GO:0005802	trans-Golgi network	cellular_component	9	C17ORF75 ARFIP2 KIAA1324 CHST6 AP4S1 AP1S3 VPS53 SCAMP1 RAB21
GO:2000116	regulation of cysteine-type endopeptidase activity	biological_process	8	XIAP NLRP12 SERPINB9 MEFV HMGB1 GPI F2R HIP1
GO:0006821	chloride transport	biological_process	5	SLC26A4 CLCC1 SLC6A4 APOL1 SLC12A6
GO:0016746	transferase activity, transferring acyl groups	molecular_function	9	DBT MBOAT1 MEAF6 ZDHHC3 CPT1A TADA3 LRAT NMT2 SPTLC2
GO:0046872	metal ion binding	molecular_function	86	ZNF543 XPNPEP3 NUAK2 ZFP82 ZNF454 IDO1 DSG2 LPP PCDH11Y GALNT4 TRIM45 CHP1 DNAJC21 GDPD1 APOBEC3A ZHX3 PDE4C ME2 EEF2K LIMS1 LDLR AGMO ZMAT3 ZNF554 UBOX5 SLC6A4 IKZF3 ZNF793 ZNF655 ZNF530 CYP51A1 ARHGAP45 ZKSCAN1 ZNF805 ZNF114 ZNF529 MEFV ZNF665 GALNT15 RLIM SMAD9 ZNF106 ADAT1 POLH ZNF124 DGKH XIAP ZBTB8A RNF14 LETM1 ERAP2 ITGAX MDM4 MTG2 ZNF514 SMG1 ABL2 DSG3 THAP5 IDS DTX3L SMYD4 RNF41 TSNAX FB…
GO:0008168	methyltransferase activity	molecular_function	7	METTL21A RBBP5 BCDIN3D INMT TRMT2B SMYD4 GAMT
GO:0032651	regulation of interleukin-1 beta production	biological_process	4	NLRP12 HMGB1 MEFV F2R
GO:0036503	ERAD pathway	biological_process	4	UGGT1 UBE2G2 SGTB FBXO6
GO:0006885	regulation of pH	biological_process	4	SLC4A8 CHP1 ATP6V0A2 SLC26A4
GO:0016241	regulation of macroautophagy	biological_process	6	RUBCN ATP6V0A2 TIGAR SPTLC2 KIAA1324 RNF41
GO:0008033	tRNA processing	biological_process	5	ADAT1 MTFMT TRMT2B BCDIN3D ANKRD16
GO:0051250	negative regulation of lymphocyte activation	biological_process	6	AXL IRF1 HMGB1 IDO1 JAK3 PAG1
GO:0043648	dicarboxylic acid metabolic process	biological_process	4	GCLM NMNAT1 QPRT ME2
GO:0000981	DNA-binding transcription factor activity, RNA polymerase II-specific	molecular_function	36	ZNF426 ZNF655 IKZF3 ZNF793 ARNTL2 HOMEZ ZNF554 ATF6 FOXK1 ZNF124 ZNF91 ELMSAN1 IRF1 ARGFX SMAD9 ZNF490 REL ZNF665 ZHX3 THAP5 ZNF529 ZNF652 ZNF114 ZNF805 ZKSCAN1 ZNF514 SPIB TERF2 CRX ZNF451 ZNF454 ZNF530 ZFP82 TOX4 TCF7 ZNF543
GO:0016747	transferase activity, transferring acyl groups other than amino-acyl groups	molecular_function	8	NMT2 LRAT SPTLC2 CPT1A TADA3 DBT MEAF6 ZDHHC3
GO:0006090	pyruvate metabolic process	biological_process	5	TIGAR GPI PDP2 ME2 PGM2L1
GO:0012506	vesicle membrane	cellular_component	22	TBC1D24 CAMK2G ATP6V0A2 COPA SVOP PIGR TSPAN14 RAB3B LILRB3 ITGAX CD109 RAB27A HIP1 AP1S3 SNAP29 RAB21 SCAMP1 AP3S2 LDLR SCARF1 SNTB2 SGSM1
GO:0045807	positive regulation of endocytosis	biological_process	4	RAB21 AXL EEF2K HIP1
GO:1902936	phosphatidylinositol bisphosphate binding	molecular_function	4	HIP1 GSDMA GSDMB WDR45
GO:0034101	erythrocyte homeostasis	biological_process	5	TRIM58 JAK3 GPI SFXN1 AXL
GO:0045619	regulation of lymphocyte differentiation	biological_process	6	RNF41 IKZF3 HMGB1 IRF1 AXL JAK3
GO:0043169	cation binding	molecular_function	87	SMG1 THAP5 DSG3 ABL2 ITGAX MDM4 ZNF514 MTG2 SMYD4 RNF41 IDS DTX3L NKD1 PDP2 CYP8B1 ECE1 ZNF652 BRIP1 FBLIM1 TSNAX CABP4 MOB1A ZNF451 TRIM52 ZNF426 RNF157 ZRANB3 PGM2L1 ZNF490 PDE6A TRIM65 ZNF91 RASGRP4 MGAT4A TRIM58 CYB5R3 CHP1 TRIM45 GDPD1 ZHX3 APOBEC3A DNAJC21 ZNF454 IDO1 ZNF543 ZFP82 NUAK2 XPNPEP3 PCDH11Y GALNT4 DSG2 LPP AGMO ZMAT3 ZNF554 IKZF3 ZNF793 ZNF655 SLC6A4 UBOX5 ME2 EEF2K PDE4C LIMS1 …
GO:0009058	biosynthetic process	biological_process	125	UGGT1 NLRP12 POFUT1 TERF2 TOX4 ZNF530 DSEL TCF7 GTF2H5 CYP51A1 MTMR9 ZNF529 MTFMT TADA3 P3H4 ZNF665 PIGC ZKSCAN1 AK1 ZNF114 ZNF805 GPI ELMSAN1 SGPP2 ATF6 GK5 POLH ZNF124 MRPL30 GALNT15 RLIM SMAD9 CLN8 ARNTL2 OR7D2 RNF14 XIAP CRX F2R GALNT4 SPIB ZFP82 SLC25A15 ZNF543 IDO1 ZNF454 ZHX3 GCLM GOLGA2 CHP1 LDLR LIMS1 PDE4C CAMK1D EEF2K FUT3 REL SPTLC2 TAF8 UBIAD1 SLC6A4 ZNF655 ZNF793 IKZF3 TMF1 ZNF554 W…
GO:0004553	hydrolase activity, hydrolyzing O-glycosyl compounds	molecular_function	4	ACER3 MANEAL LYZ TERF2
GO:0043281	regulation of cysteine-type endopeptidase activity involved in apoptotic process	biological_process	7	NLRP12 XIAP SERPINB9 HMGB1 GPI HIP1 F2R
GO:0098793	presynapse	cellular_component	13	OPRM1 SLC6A4 RAB3B SNAP29 SVOP SCAMP1 FBXL20 CABP4 PLEKHG5 GRM6 HIP1 FZD3 TBC1D24
GO:0098656	anion transmembrane transport	biological_process	11	SLC25A15 APOL1 SLC43A2 SLC12A6 SLC35B4 SFXN1 CLCC1 SLC4A8 CPT1A SLC6A4 SLC26A4
GO:0007286	spermatid development	biological_process	5	ICA1L BRIP1 CCR6 TMF1 FAM9B
GO:2001020	regulation of response to DNA damage stimulus	biological_process	7	POLH HMGB1 DTX3L SMG1 TERF2 SPRED1 TIGAR
GO:1903038	negative regulation of leukocyte cell-cell adhesion	biological_process	5	IRF1 HMGB1 IDO1 PAG1 JAK3
GO:0072686	mitotic spindle	cellular_component	4	TADA3 KIF18B GOLGA2 FAM161A
GO:0008047	enzyme activator activity	molecular_function	14	ARHGAP45 DCP1A TBC1D15 RUNDC1 PGAM5 SGSM1 ARHGAP26 DTX3L NLRP12 PHACTR4 TBC1D24 PPP1R12B TOR1AIP2 CCL5
GO:0031410	cytoplasmic vesicle	cellular_component	53	TBC1D24 SVOP MEFV PIGR PLEKHB2 ECE1 JAK3 ARHGAP45 HIP1 C17ORF75 SNAP29 SGSM1 VPS53 CAMK2G DGKH KIAA1324 SLC31A1 OPRM1 TSPAN14 RUBCN GALNT15 SCAMP1 HMGB1 AP3S2 GPI CYB5R3 CHP1 GOLGA2 ATP6V0A2 ATG14 COPA ENTPD4 LRAT AP4S1 RAB3B SPRED1 LILRB3 ITGAX CD109 RAB27A SCARF1 SNTB2 F2R SPPL3 ICA1L SLC6A4 LYZ AP1S3 RAB21 HEATR5A PLEKHG5 DTX3L LDLR
GO:0097708	intracellular vesicle	cellular_component	53	GOLGA2 CHP1 ATG14 ATP6V0A2 COPA ENTPD4 LRAT AP4S1 RAB3B SPRED1 ITGAX LILRB3 CD109 RAB27A SCARF1 F2R SNTB2 SPPL3 ICA1L SLC6A4 LYZ AP1S3 RAB21 HEATR5A PLEKHG5 DTX3L LDLR TBC1D24 SVOP MEFV PIGR PLEKHB2 ECE1 JAK3 ARHGAP45 C17ORF75 HIP1 SNAP29 SGSM1 VPS53 CAMK2G DGKH KIAA1324 SLC31A1 OPRM1 TSPAN14 RUBCN GALNT15 SCAMP1 HMGB1 AP3S2 CYB5R3 GPI
GO:0008509	anion transmembrane transporter activity	molecular_function	10	SLC43A2 APOL1 SLC25A15 SLC12A6 SLC35B4 SFXN1 SLC6A4 SLC4A8 CLCC1 SLC26A4
GO:0048640	negative regulation of developmental growth	biological_process	4	NKD1 SLC6A4 SEMA4F SEMA3E
GO:0097153	cysteine-type endopeptidase activity involved in apoptotic process	molecular_function	7	HIP1 F2R GPI HMGB1 SERPINB9 XIAP NLRP12
GO:0032611	interleukin-1 beta production	biological_process	4	MEFV HMGB1 F2R NLRP12
GO:0007041	lysosomal transport	biological_process	4	DTX3L ATG14 HOOK3 VPS53
GO:0032588	trans-Golgi network membrane	cellular_component	5	SCAMP1 VPS53 AP1S3 ARFIP2 AP4S1
GO:0042802	identical protein binding	molecular_function	39	TLR10 GBP4 LYZ PNPO LDLR FAM161A PTK6 ATF6 GRM6 CAMK2G XIAP SPPL3 SLC6A4 IKZF3 UBE2G2 SLC31A1 NMNAT1 HIP1 XPNPEP3 DCP1A ACSL6 CD84 QPRT CBX5 DESI1 TERF2 GLTP MRI1 HOOK3 ZNF114 GOLGA2 ARFIP2 ECE1 CPT1A MEFV ISPD IFIT3 CCL5 ZHX3
GO:0051186	cofactor metabolic process	biological_process	12	PDP2 GAMT IDO1 MRI1 ACSL6 PNPO UBIAD1 PIPOX CYB5R3 QPRT NMNAT1 GCLM
GO:0019903	protein phosphatase binding	molecular_function	5	JAK3 AKAP5 PHACTR4 MTMR9 KIF3A
GO:0048515	spermatid differentiation	biological_process	5	CCR6 FAM9B TMF1 ICA1L BRIP1
GO:0006644	phospholipid metabolic process	biological_process	12	SMG1 DGKH RUBCN ATG14 SPTLC2 GDPD1 PIGC PIGX LDLR MBOAT1 CLN8 MTMR9
GO:1901565	organonitrogen compound catabolic process	biological_process	30	APOBEC3A ACER3 ECE1 CHP1 NKD1 ENTPD4 MDM4 DBT QPRT SGTB UGGT1 FBXO6 CYP51A1 IDO1 ERAP2 FBXL18 RNF14 TMF1 UBE2G2 RNF41 CLN8 PIPOX FBXL20 PLEKHG5 DTX3L TRIM58 LDLR PDE4C RLIM IDS
GO:0016810	hydrolase activity, acting on carbon-nitrogen (but not peptide) bonds	molecular_function	5	DPYSL5 ZBP1 ADAT1 ACER3 APOBEC3A
GO:0007018	microtubule-based movement	biological_process	8	CLUAP1 RAB21 TERF2 KIF18B AP3S2 TRIM58 KIF1C KIF3A
GO:0016052	carbohydrate catabolic process	biological_process	6	GPI TIGAR FUT2 PGM2L1 GK5 PPP1R3B
GO:0046834	lipid phosphorylation	biological_process	4	SMG1 RUBCN ATG14 DGKH
GO:0005789	endoplasmic reticulum membrane	cellular_component	27	ERAP2 UBIAD1 CLN8 CAMK2G SPPL3 AGMO GRM6 RAB21 ATF6 SGPP2 CYB5R3 MBOAT1 SLC35B4 SPTLC2 PNPT1 PIGC ACER3 GDPD1 CYP8B1 LRAT TOR1AIP2 COPA ATG14 PIGX REEP3 CYP51A1 ACSL6
GO:0043524	negative regulation of neuron apoptotic process	biological_process	5	GPI F2R NMNAT1 GCLM AXL
GO:0006629	lipid metabolic process	biological_process	32	MTMR9 CPT1A LRAT CYP8B1 ACER3 PIGC GDPD1 ISPD ATG14 GLTP ST8SIA4 AKR1D1 PDP2 SMG1 SCARF1 PIGX ACSL6 PEX13 CYP51A1 CLN8 APOL1 AGMO PLCXD1 DGKH LDLR CYB5R3 MBOAT1 SGPP2 FUT3 GK5 RUBCN SPTLC2
GO:0032652	regulation of interleukin-1 production	biological_process	4	MEFV HMGB1 F2R NLRP12
GO:0006457	protein folding	biological_process	7	DFFA UGGT1 DNAJC21 NUDC SGTB ATF6 PPIL6
GO:0006575	cellular modified amino acid metabolic process	biological_process	6	MRI1 GCLM PIPOX CPT1A MBOAT1 GAMT
GO:0046395	carboxylic acid catabolic process	biological_process	8	CHP1 PEX13 IDO1 AKR1D1 DBT QPRT CPT1A PIPOX
GO:2001056	positive regulation of cysteine-type endopeptidase activity	biological_process	5	HIP1 F2R NLRP12 MEFV HMGB1
GO:0051015	actin filament binding	molecular_function	6	ABL2 HIP1 SLC6A4 SHROOM1 PSTPIP2 TPM3
GO:0051650	establishment of vesicle localization	biological_process	8	GOLGA2 KIF1C KIF3A RAB27A C17ORF75 SNAP29 FBXL20 AP3S2
GO:0008757	S-adenosylmethionine-dependent methyltransferase activity	molecular_function	5	METTL21A RBBP5 INMT TRMT2B GAMT
GO:0006664	glycolipid metabolic process	biological_process	4	GLTP ST8SIA4 PIGX PIGC
GO:0006790	sulfur compound metabolic process	biological_process	10	PIPOX GCLM CHST6 DSEL GAMT IDS PDP2 CIAO1 ACSL6 MRI1
GO:0019902	phosphatase binding	molecular_function	6	KIF3A PHACTR4 MTMR9 SPRED1 JAK3 AKAP5
GO:0006650	glycerophospholipid metabolic process	biological_process	10	LDLR MBOAT1 MTMR9 PIGC GDPD1 PIGX RUBCN ATG14 DGKH SMG1
GO:0015698	inorganic anion transport	biological_process	6	SLC26A4 CLCC1 SLC6A4 SLC4A8 APOL1 SLC12A6
GO:0009451	RNA modification	biological_process	5	MTFMT TRMT2B ANKRD16 APOBEC3A BCDIN3D
GO:0042175	nuclear outer membrane-endoplasmic reticulum membrane network	cellular_component	27	PIGX REEP3 ACSL6 CYP51A1 LRAT CYP8B1 ACER3 PIGC GDPD1 TOR1AIP2 ATG14 COPA ATF6 RAB21 MBOAT1 CYB5R3 SGPP2 SLC35B4 PNPT1 SPTLC2 ERAP2 CLN8 UBIAD1 SPPL3 CAMK2G GRM6 AGMO
GO:0051345	positive regulation of hydrolase activity	biological_process	19	ARHGAP26 LIMS1 F2R SGSM1 NLRP12 RASGRP4 HMGB1 CCL22 HIP1 RUNDC1 TBC1D15 PGAM5 ARHGAP45 ABL2 MTMR9 TOR1AIP2 CCL5 MEFV TBC1D24
GO:0006165	nucleoside diphosphate phosphorylation	biological_process	4	TIGAR AK1 PGM2L1 GPI
GO:0046939	nucleotide phosphorylation	biological_process	4	PGM2L1 GPI TIGAR AK1
GO:0043547	positive regulation of GTPase activity	biological_process	11	LIMS1 ARHGAP26 SGSM1 F2R CCL5 CCL22 PGAM5 TBC1D24 RUNDC1 TBC1D15 ARHGAP45
GO:0044255	cellular lipid metabolic process	biological_process	25	CPT1A MTMR9 GDPD1 PIGC ACER3 ISPD LRAT PDP2 GLTP ATG14 ST8SIA4 SMG1 PIGX PEX13 ACSL6 CLN8 AGMO DGKH SGPP2 LDLR MBOAT1 FUT3 GK5 SPTLC2 RUBCN
GO:0006399	tRNA metabolic process	biological_process	6	TRMT2B MTFMT ADAT1 ANKRD16 DTD2 BCDIN3D
GO:0003779	actin binding	molecular_function	11	PHACTR4 HIP1 SHROOM1 GAS2L3 PSTPIP2 TPM3 FMN1 ABL2 SNTB2 SLC6A4 MEFV
GO:0042582	azurophil granule	cellular_component	5	SNAP29 ARHGAP45 CYB5R3 PIGR LYZ
GO:0005525	GTP binding	molecular_function	10	ARFIP2 LSG1 RAB3B TUBD1 MTG2 RAB21 AK3 RAB27A GBP4 IRGQ
GO:0016853	isomerase activity	molecular_function	5	MRI1 PPIL6 PGM2L1 DSEL GPI
GO:0046434	organophosphate catabolic process	biological_process	4	LDLR ENTPD4 PDE4C GDPD1
GO:0009991	response to extracellular stimulus	biological_process	13	GCLM LRAT OPRM1 SLC6A4 BRIP1 ATG14 WDR45 KIAA1324 RASGRP4 LDLR GIPR AXL NUAK2
GO:0006006	glucose metabolic process	biological_process	6	GPI TIGAR CPT1A PGM2L1 PPP1R3B SLC35B4
GO:0016482	cytosolic transport	biological_process	5	RAB21 HEATR5A VPS53 HOOK3 KIF1C
GO:0016798	hydrolase activity, acting on glycosyl bonds	molecular_function	4	LYZ MANEAL TERF2 ACER3
GO:0009117	nucleotide metabolic process	biological_process	13	NMNAT1 PIPOX AK1 AK3 ENTPD4 PDP2 PDE4C GPI QPRT TIGAR IDO1 PGM2L1 ACSL6
GO:0030100	regulation of endocytosis	biological_process	6	RUBCN ABL2 EEF2K HIP1 RAB21 AXL
GO:0008514	organic anion transmembrane transporter activity	molecular_function	6	SLC43A2 SLC4A8 SLC25A15 SLC26A4 SFXN1 SLC35B4
GO:0051648	vesicle localization	biological_process	8	AP3S2 FBXL20 SNAP29 RAB27A KIF3A C17ORF75 GOLGA2 KIF1C
GO:0006886	intracellular protein transport	biological_process	26	AP4S1 AKAP5 RAB3B ARFIP2 CHP1 SMG1 RPL36A COPA TERF2 SGTB SGSM1 RUNDC1 TBC1D15 PEX13 RAB27A HIP1 C17ORF75 UBE2G2 CLUAP1 PIPOX KIF3A RAB21 AP1S3 AP3S2 ZDHHC3 KPNA6
GO:0007010	cytoskeleton organization	biological_process	29	GOLGA8O TUBD1 NUAK2 HIP1 FMN1 ABL2 ARFIP2 CHP1 GOLGA2 HOOK3 GAS2L3 GOLGA8N STRIP2 GOLGA8J CEP68 SKA1 GOLGA8H ARHGAP26 KIF18B SHROOM1 TPM3 PSTPIP2 GOLGA6C SEMA3E GOLGA8R GOLGA8M KIF3A GOLGA8K PHACTR4
GO:0005623	cell	cellular_component	324	PSTPIP2 AP5B1 NOL9 GAMT VSTM4 ZNF91 PHACTR4 DCP1A C17ORF75 SNAP29 QPRT DBT CBX5 PDP2 SLC4A8 PLEKHB2 FMN1 TLR10 GOLGA8H ZDHHC3 GOLGA8R CCR6 PLCXD1 PGPEP1 BTN3A2 GSDMA SUGP2 FBXO6 LILRB3 FZD3 GOLGA8O MDM4 LSG1 NUDC MRI1 HOOK3 ENTPD4 CHST6 GOLGA8N ISPD SHROOM1 GK5 PTK6 KIF18B TIGAR AP3S2 DGKH OR7D2 ARNTL2 TMEM130 HIP1 TOX4 BCDIN3D POFUT1 DESI1 BIVM MEFV MTFMT ZNF529 REL GOLGA6C LIMS1 ZMAT3 KIF3A IKZ…
GO:0006753	nucleoside phosphate metabolic process	biological_process	13	PDE4C TIGAR GPI QPRT IDO1 PGM2L1 ACSL6 NMNAT1 PIPOX AK1 PDP2 AK3 ENTPD4
GO:0046488	phosphatidylinositol metabolic process	biological_process	6	SMG1 PIGX PIGC MTMR9 RUBCN ATG14
GO:1901215	negative regulation of neuron death	biological_process	7	REL GPI TIGAR F2R NMNAT1 GCLM AXL
GO:0009582	detection of abiotic stimulus	biological_process	4	NMT2 CABP4 GRM6 PDE6A
GO:0003924	GTPase activity	molecular_function	18	RAB3B CCL5 TBC1D24 LSG1 F2R SGSM1 ARHGAP26 LIMS1 TUBD1 RAB21 MTG2 GBP4 RAB27A CCL22 ARHGAP45 TBC1D15 RUNDC1 PGAM5
GO:0016192	vesicle-mediated transport	biological_process	43	ABL2 RAB3B GRK3 CHP1 GOLGA2 HOOK3 ATG14 COPA SCARF1 LILRB3 ITGAX CD109 RAB27A DCTN5 KIF3A RAB21 HEATR5A AP1S3 DTX3L LDLR CAMK1D EEF2K AXL LYZ CCL5 PIGR KIF1C SNAP29 CD84 ARHGAP45 HIP1 C17ORF75 TSPAN14 VPS53 APOL1 FBXL20 SCAMP1 HMGB1 CYB5R3 GPI AP3S2 AP5B1 RUBCN
GO:0051224	negative regulation of protein transport	biological_process	6	F2R OPRM1 CYP51A1 UBE2G2 CHP1 NLRP12
GO:0005741	mitochondrial outer membrane	cellular_component	5	ACSL6 PGAM5 CYB5R3 TIGAR CPT1A
GO:0016787	hydrolase activity	molecular_function	75	ERAP2 METTL21A NRIP3 XIAP CAMK2G PHACTR4 RASGRP4 HMGB1 TIGAR ADAT1 ARHGAP26 GPI DPYSL5 KIF18B SGPP2 ZRANB3 CCL22 PDE6A CCL5 ACER3 MEFV MTMR9 PPP1R12B BRIP1 ECE1 TBC1D24 KIF1C PDP2 DESI1 NLRP12 TERF2 TUBD1 SGSM1 RUNDC1 TBC1D15 ARHGAP45 DCP1A TSNAX HIP1 DTD2 DFFA PGPEP1 SPPL3 PPP1R3B KIF3A PLCXD1 RAB21 ISG20L2 LIMS1 PDE4C PGAM5 LYZ IDS GBP4 PNPT1 SPATA5 APOBEC3A GDPD1 DIS3L TOR1AIP2 ABL2 SPRED1 RAB…
GO:0098562	cytoplasmic side of membrane	cellular_component	5	HIP1 SPPL3 RAB21 PTK6 AKAP5
GO:0001883	purine nucleoside binding	molecular_function	10	RAB21 MTG2 LSG1 RAB3B ARFIP2 TUBD1 AK3 GBP4 RAB27A IRGQ
GO:0032549	ribonucleoside binding	molecular_function	10	RAB27A GBP4 IRGQ AK3 TUBD1 ARFIP2 RAB3B LSG1 MTG2 RAB21
GO:0070925	organelle assembly	biological_process	20	GOLGA8H GOLGA8O SNAP29 FAM161A TBC1D15 GOLGA6C CLUAP1 TMF1 GOLGA8M RRP7A GOLGA8R TBC1D24 GOLGA2 GOLGA8J KIAA1324 GOLGA8K GOLGA8N ATG14 WDR45 KIF3A
GO:0044237	cellular metabolic process	biological_process	207	ZNF793 TMF1 UBIAD1 UBOX5 DCAF16 SBNO1 AGMO ZNF554 WDR45 FUT3 ME2 EEF2K LDLR PGAM5 SPTLC2 GCLM SPRED1 CHP1 GOLGA2 GLTP ATP6V0A2 SERPINB9 SPIB ZNF454 ZNF543 SLC25A15 ERAP2 XIAP POLH MRPL30 ATF6 SGPP2 ELMSAN1 GPI ADAT1 SMAD9 GALNT15 RTCA RBM41 LYRM7 PIGC DCAF7 RBBP5 ZNF665 P3H4 TADA3 MTMR9 RBMS2 ZNF805 ZNF114 AK1 TERF2 NLRP12 CD84 TRMT2B DSEL ZNF530 RNF41 NMNAT1 FBXL18 PIPOX DFFA PPP1R3B SOGA3 SPPL3…
GO:0090501	RNA phosphodiester bond hydrolysis	biological_process	5	TSNAX PNPT1 NOL9 ISG20L2 DIS3L
GO:0000776	kinetochore	cellular_component	4	CBX5 DCTN5 MEAF6 SKA1
GO:0050880	regulation of blood vessel size	biological_process	4	SLC6A4 F2R ECE1 GCLM
GO:0000793	condensed chromosome	cellular_component	6	P3H4 SKA1 FAM9B HMGB1 MEAF6 DCTN5
GO:0004497	monooxygenase activity	molecular_function	5	TERF2 CYP8B1 CYP51A1 AKR1D1 AGMO
GO:0042176	regulation of protein catabolic process	biological_process	10	NKD1 CYP51A1 MDM4 RNF41 PLEKHG5 UBE2G2 TMF1 RNF14 FBXL20 LDLR
GO:0003700	DNA-binding transcription factor activity	molecular_function	43	TONSL HOMEZ ARNTL2 TRIM52 ZNF426 ZNF490 IRF1 RLIM SMAD9 ELMSAN1 ZNF124 ZNF91 ATF6 ZKSCAN1 ZNF805 ZNF114 ZNF652 ZNF529 ZNF665 TCF7 ZNF530 TOX4 ZNF451 TERF2 NLRP12 ZNF554 IKZF3 RNF41 ZNF793 ZNF655 REL ARGFX CAMK1D FOXK1 CHP1 THAP5 ZHX3 ZNF543 ZFP82 ZNF454 CRX ZNF514 SPIB
GO:0098657	import into cell	biological_process	16	RAB21 HEATR5A EEF2K LDLR SCARF1 AXL HIP1 RUBCN SLC12A6 KCNJ5 SLC31A1 SLC6A4 RAB3B GRK3 ABL2 APOL1
GO:0005774	vacuolar membrane	cellular_component	12	BORCS7 ATG14 ATP6V0A2 KIAA1324 ENTPD4 AP5B1 LDLR PIGR ECE1 SNAP29 AP1S3 DTX3L
GO:0048872	homeostasis of number of cells	biological_process	7	JAK3 SFXN1 AXL HMGB1 TRIM58 GPI F2R
GO:0035150	regulation of tube size	biological_process	4	GCLM SLC6A4 F2R ECE1
GO:0004540	ribonuclease activity	molecular_function	4	TSNAX PNPT1 ISG20L2 DIS3L
GO:0005975	carbohydrate metabolic process	biological_process	14	CPT1A ALDH1B1 PPP1R3B CHST6 ST8SIA4 FUT3 GK5 POFUT1 FUT2 TIGAR CYB5R3 GPI SLC35B4 PGM2L1
GO:0016791	phosphatase activity	molecular_function	11	PDP2 PHACTR4 CAMK2G PPP1R3B CHP1 PGAM5 SPRED1 SGPP2 MTMR9 PPP1R12B TIGAR
GO:0043280	positive regulation of cysteine-type endopeptidase activity involved in apoptotic process	biological_process	4	F2R HIP1 HMGB1 NLRP12
GO:0001882	nucleoside binding	molecular_function	10	AK3 RAB27A GBP4 IRGQ ARFIP2 RAB3B LSG1 TUBD1 MTG2 RAB21
GO:0016311	dephosphorylation	biological_process	12	PPP1R12B MTMR9 TIGAR SPRED1 SGPP2 SPPL3 CHP1 PGAM5 CAMK2G PPP1R3B PHACTR4 PDP2
GO:0005770	late endosome	cellular_component	7	LDLR RUBCN RAB27A F2R KIAA1324 LRAT SLC31A1
GO:0010976	positive regulation of neuron projection development	biological_process	7	RAB21 PTK6 SCARF1 ABL2 RNF157 CAMK1D EEF2K
GO:0050801	ion homeostasis	biological_process	18	GIPR PDE6A SLC12A6 HMGB1 F2R SPPL3 XIAP SFXN1 CCR6 CHP1 ATP6V0A2 LETM1 SLC31A1 SLC26A4 CCL5 GCLM SLC4A8 ABL2
GO:0005543	phospholipid binding	molecular_function	10	HIP1 WDR45 GLTP GSDMA AXL ARFIP2 ARHGAP26 PLEKHB2 GSDMB HMGB1
GO:0006766	vitamin metabolic process	biological_process	4	UBIAD1 CYB5R3 PNPO LRAT
GO:0032479	regulation of type I interferon production	biological_process	4	IRF1 HMGB1 ZBP1 REL
GO:1901605	alpha-amino acid metabolic process	biological_process	6	GAMT PIPOX NMNAT1 GCLM IDO1 MRI1
GO:0009259	ribonucleotide metabolic process	biological_process	10	AK3 ENTPD4 PDP2 PGM2L1 ACSL6 AK1 GPI TIGAR PDE4C PIPOX
GO:0032606	type I interferon production	biological_process	4	ZBP1 REL IRF1 HMGB1
GO:0046425	regulation of receptor signaling pathway via JAK-STAT	biological_process	4	F2R PTK6 CCL5 JAK3
GO:0051649	establishment of localization in cell	biological_process	45	TBC1D15 RUNDC1 HIP1 C17ORF75 SNAP29 TERF2 SGSM1 CD84 SGTB KIF1C AKAP5 CPT1A AP5B1 FBXL20 KPNA6 TRIM58 AP3S2 VPS53 CLUAP1 UBE2G2 LETM1 PEX13 RAB27A DCTN5 F2R LSG1 HOOK3 CHP1 GOLGA2 SMG1 COPA RPL36A ATG14 AP4S1 ARFIP2 RAB3B DTX3L AP1S3 HEATR5A RAB21 ZDHHC3 LDLR KIF3A SLC6A4 PIPOX
GO:0050920	regulation of chemotaxis	biological_process	6	CCL5 CCR6 SEMA3E HMGB1 SEMA4F CAMK1D
GO:0008528	G protein-coupled peptide receptor activity	molecular_function	4	OPRM1 F2R CCR6 GIPR
GO:0032561	guanyl ribonucleotide binding	molecular_function	10	IRGQ RAB27A GBP4 AK3 TUBD1 ARFIP2 RAB3B LSG1 RAB21 MTG2
GO:0001818	negative regulation of cytokine production	biological_process	8	MEFV HMGB1 NLRP12 CD84 AXL IDO1 JAK3 REL
GO:0061351	neural precursor cell proliferation	biological_process	4	ACSL6 HOOK3 FZD3 SLC6A4
GO:0035303	regulation of dephosphorylation	biological_process	6	PPP1R3B SPPL3 CHP1 SPRED1 PHACTR4 MTMR9
GO:0042119	neutrophil activation	biological_process	13	LYZ RAB27A ITGAX LILRB3 ARHGAP45 PIGR TSPAN14 GPI CYB5R3 CCL5 SNAP29 SCAMP1 HMGB1
GO:1905039	carboxylic acid transmembrane transport	biological_process	5	SLC25A15 CPT1A SLC43A2 SFXN1 SLC26A4
GO:0019693	ribose phosphate metabolic process	biological_process	10	GPI TIGAR PIPOX PDE4C ENTPD4 AK3 PDP2 ACSL6 PGM2L1 AK1
GO:0007034	vacuolar transport	biological_process	4	ATG14 DTX3L HOOK3 VPS53
GO:0004519	endonuclease activity	molecular_function	4	DIS3L HMGB1 ZRANB3 TSNAX
GO:0060560	developmental growth involved in morphogenesis	biological_process	6	SEMA4F RNF157 FMN1 SEMA3E RAB21 NKD1
GO:0005773	vacuole	cellular_component	19	AP5B1 ARHGAP45 RAB27A IDS RUBCN BORCS7 LYZ AP1S3 SNAP29 DTX3L CYB5R3 LDLR ATG14 ATP6V0A2 ENTPD4 KIAA1324 MEFV PIGR ECE1
GO:0017137	Rab GTPase binding	molecular_function	5	SLC6A4 SGSM1 KIF3A TBC1D15 RUNDC1
GO:1901214	regulation of neuron death	biological_process	9	F2R TIGAR GPI CCL5 GCLM NMNAT1 REL AXL CHP1
GO:0002687	positive regulation of leukocyte migration	biological_process	4	CAMK1D HMGB1 CCL5 CCR6
GO:0050921	positive regulation of chemotaxis	biological_process	4	CAMK1D CCR6 CCL5 HMGB1
GO:0042737	drug catabolic process	biological_process	4	QPRT ECE1 ALDH1B1 PIPOX
GO:0010950	positive regulation of endopeptidase activity	biological_process	5	HIP1 F2R NLRP12 MEFV HMGB1
GO:0010921	regulation of phosphatase activity	biological_process	5	SPRED1 PHACTR4 MTMR9 PPP1R3B CHP1
GO:0035091	phosphatidylinositol binding	molecular_function	6	GSDMB PLEKHB2 WDR45 HIP1 ARFIP2 GSDMA
GO:0043085	positive regulation of catalytic activity	biological_process	30	MEFV AKAP5 CCL5 GCLM ABL2 MTMR9 PPP1R12B TOR1AIP2 TBC1D24 GOLGA2 PDP2 ATG14 NLRP12 TERF2 F2R SGSM1 DCP1A ARHGAP45 TBC1D15 RUNDC1 HIP1 PHACTR4 RASGRP4 DTX3L HMGB1 ARHGAP26 TIGAR LIMS1 PGAM5 CCL22
GO:0009306	protein secretion	biological_process	14	CYP51A1 GIPR TLR10 HMGB1 NLRP12 F2R GPI CAMK2G TRAF3IP2 CCL5 RAB3B BTN3A2 CPT1A OPRM1
GO:0043069	negative regulation of programmed cell death	biological_process	21	NUAK2 FZD3 TCF7 JAK3 IDO1 AXL GPI TIGAR CAMK1D EEF2K F2R SERPINB9 MDM4 XIAP RNF157 DFFA NMNAT1 CCL5 GCLM TMF1 IFIT3
GO:0030258	lipid modification	biological_process	7	MTMR9 CPT1A RUBCN ATG14 SMG1 DGKH PEX13
GO:0000151	ubiquitin ligase complex	cellular_component	7	FBXL18 FBXL20 DCAF7 DCAF10 RNF14 DCAF16 FBXO6
GO:0046777	protein autophosphorylation	biological_process	6	NLRP12 PTK6 CHP1 SMG1 EEF2K ABL2
GO:0043687	post-translational protein modification	biological_process	9	FBXL18 FBXL20 RBBP5 MGAT4A DCAF7 DCAF10 DCAF16 FBXO6 APOL1
GO:0007586	digestion	biological_process	4	COPA LDLR AKR1D1 VSIG1
GO:0030667	secretory granule membrane	cellular_component	8	TSPAN14 PIGR SCAMP1 SNAP29 RAB27A CD109 ITGAX LILRB3
GO:0005096	GTPase activator activity	molecular_function	7	ARHGAP26 SGSM1 PGAM5 TBC1D24 TBC1D15 RUNDC1 ARHGAP45
GO:0031300	intrinsic component of organelle membrane	cellular_component	11	ACER3 ATF6 ECE1 CPT1A UBIAD1 RAB3B PEX13 SLC35B4 SPPL3 SFXN1 ENTPD4
GO:0046943	carboxylic acid transmembrane transporter activity	molecular_function	4	SLC25A15 SLC43A2 SFXN1 SLC26A4
GO:0048489	synaptic vesicle transport	biological_process	4	SNAP29 FBXL20 AP3S2 RAB27A
GO:0016779	nucleotidyltransferase activity	molecular_function	5	PNPT1 NMNAT1 TERF2 POLH ISPD
GO:0005875	microtubule associated complex	cellular_component	4	KIF18B KIF3A KIF1C MEFV
GO:0009898	cytoplasmic side of plasma membrane	cellular_component	4	AKAP5 PTK6 RAB21 HIP1
GO:0030234	enzyme regulator activity	molecular_function	23	SPRED1 TOR1AIP2 PPP1R12B MTMR9 GCLM CCL5 CHP1 TBC1D24 SGSM1 SERPINB9 NLRP12 DCP1A ARHGAP45 CD109 TBC1D15 RUNDC1 DFFA PHACTR4 PPP1R3B XIAP ARHGAP26 DTX3L PGAM5
GO:0015291	secondary active transmembrane transporter activity	molecular_function	6	LETM1 CHP1 SLC26A4 SLC6A4 SLC4A8 SLC12A6
GO:0009165	nucleotide biosynthetic process	biological_process	7	AK3 PDP2 IDO1 ACSL6 AK1 QPRT NMNAT1
GO:1990234	transferase complex	cellular_component	17	ZNF451 CBX5 MEAF6 FBXL20 SPTLC2 TAF8 GTF2H5 FBXO6 TADA3 DCAF16 DCAF10 DCAF7 RNF14 PIGC RBBP5 FBXL18 ATG14
GO:0006310	DNA recombination	biological_process	7	ZRANB3 TONSL CCR6 TCF7 HMGB1 TERF2 BRIP1
GO:0008202	steroid metabolic process	biological_process	8	CYP51A1 AKR1D1 APOL1 CYP8B1 LDLR SCARF1 CYB5R3 CLN8
GO:0046631	alpha-beta T cell activation	biological_process	4	TCF7 JAK3 IRF1 HMGB1
GO:0001653	peptide receptor activity	molecular_function	4	GIPR CCR6 OPRM1 F2R
GO:0009267	cellular response to starvation	biological_process	4	NUAK2 WDR45 ATG14 KIAA1324
GO:0030203	glycosaminoglycan metabolic process	biological_process	4	CHP1 DSEL CHST6 IDS
GO:0005925	focal adhesion	cellular_component	10	FBLIM1 CHP1 CD99 RAB21 UBOX5 SNTB2 ARHGAP26 LPP OPRM1 LIMS1
GO:0005516	calmodulin binding	molecular_function	5	CAMK1D SNTB2 EEF2K CAMK2G AKAP5
GO:0006954	inflammatory response	biological_process	17	XIAP CCR6 CCL5 MEFV ACER3 OPRM1 IDO1 AXL TLR10 REL LYZ CCL22 NLRP12 HMGB1 LDLR CAMK1D F2R
GO:0005924	cell-substrate adherens junction	cellular_component	10	UBOX5 SNTB2 ARHGAP26 LPP LIMS1 OPRM1 CD99 RAB21 FBLIM1 CHP1
GO:0022408	negative regulation of cell-cell adhesion	biological_process	5	IDO1 HMGB1 IRF1 JAK3 PAG1
GO:0019867	outer membrane	cellular_component	5	ACSL6 PGAM5 CYB5R3 TIGAR CPT1A
GO:0008610	lipid biosynthetic process	biological_process	16	AGMO AKR1D1 ST8SIA4 ISPD ACER3 PIGC CYP8B1 CLN8 MTMR9 CYP51A1 SPTLC2 PIGX SGPP2 MBOAT1 CYB5R3 LDLR
GO:0043066	negative regulation of apoptotic process	biological_process	20	GPI CAMK1D F2R EEF2K SERPINB9 MDM4 NUAK2 FZD3 TCF7 JAK3 IDO1 AXL RNF157 DFFA NMNAT1 GCLM CCL5 TMF1 IFIT3 XIAP
GO:0005765	lysosomal membrane	cellular_component	10	BORCS7 ATP6V0A2 KIAA1324 AP5B1 LDLR PIGR ECE1 SNAP29 AP1S3 DTX3L
GO:0030055	cell-substrate junction	cellular_component	10	ARHGAP26 LPP LIMS1 OPRM1 UBOX5 SNTB2 CD99 RAB21 FBLIM1 CHP1
GO:0031667	response to nutrient levels	biological_process	11	LRAT GCLM BRIP1 SLC6A4 LDLR OPRM1 GIPR KIAA1324 NUAK2 WDR45 ATG14
GO:0051656	establishment of organelle localization	biological_process	11	CD84 AP3S2 TRIM58 FBXL20 SNAP29 C17ORF75 RAB27A KIF3A KIF1C HOOK3 GOLGA2
GO:0006605	protein targeting	biological_process	10	RPL36A RAB27A PEX13 CHP1 PIPOX ZDHHC3 SGTB AP4S1 AKAP5 AP1S3
GO:0043087	regulation of GTPase activity	biological_process	11	SGSM1 F2R ARHGAP26 LIMS1 CCL5 CCL22 ARHGAP45 TBC1D24 RUNDC1 TBC1D15 PGAM5
GO:0042129	regulation of T cell proliferation	biological_process	5	IRF1 HMGB1 IDO1 JAK3 CCL5
GO:0016051	carbohydrate biosynthetic process	biological_process	5	PGM2L1 FUT3 PPP1R3B SLC35B4 GPI
GO:0009615	response to virus	biological_process	8	CCL22 IRF1 TRAF3IP2 DTX3L MICB IFIT3 APOBEC3A CCL5
GO:0007599	hemostasis	biological_process	8	DGKH IRF1 AXL AK3 RAB27A F2R GPI CBX5
GO:0055065	metal ion homeostasis	biological_process	14	SPPL3 XIAP SFXN1 CCR6 ATP6V0A2 SLC31A1 LETM1 CCL5 ABL2 GIPR PDE6A SLC12A6 HMGB1 F2R
GO:0007259	receptor signaling pathway via JAK-STAT	biological_process	4	PTK6 CCL5 JAK3 F2R
GO:0043312	neutrophil degranulation	biological_process	12	PIGR CYB5R3 GPI TSPAN14 HMGB1 SNAP29 SCAMP1 LYZ RAB27A ARHGAP45 ITGAX LILRB3
GO:0051480	regulation of cytosolic calcium ion concentration	biological_process	8	HMGB1 LETM1 F2R ABL2 CCR6 SPPL3 GIPR PDE6A
GO:0016567	protein ubiquitination	biological_process	18	FBXO6 RLIM PEX13 TRIM58 FBXL20 DTX3L XIAP GOLGA2 CHP1 DCAF16 RNF157 UBOX5 FBXL18 RNF41 UBE2G2 DCAF7 DCAF10 RNF14
GO:0030098	lymphocyte differentiation	biological_process	8	TCF7 CCR6 JAK3 IRF1 AXL RNF41 IKZF3 HMGB1
GO:0007033	vacuole organization	biological_process	4	KIAA1324 WDR45 ATG14 HOOK3
GO:0002456	T cell mediated immunity	biological_process	4	BTN3A2 MICB HMGB1 RAB27A
GO:0002790	peptide secretion	biological_process	14	TLR10 GIPR CYP51A1 GPI F2R NLRP12 HMGB1 CAMK2G OPRM1 RAB3B BTN3A2 CPT1A CCL5 TRAF3IP2
GO:0060627	regulation of vesicle-mediated transport	biological_process	12	RAB3B ABL2 HMGB1 RAB21 FBXL20 CAMK1D CD84 EEF2K AXL HIP1 RAB27A RUBCN
GO:0010720	positive regulation of cell development	biological_process	12	ABL2 OPRM1 RNF157 FZD3 RAB21 PTK6 CRX SCARF1 LIMS1 TRIM58 CAMK1D EEF2K
GO:0007156	homophilic cell adhesion via plasma membrane adhesion molecules	biological_process	4	PCDH11Y DSG3 DSG2 CD84
GO:0002283	neutrophil activation involved in immune response	biological_process	12	LILRB3 ITGAX ARHGAP45 RAB27A LYZ SCAMP1 SNAP29 HMGB1 TSPAN14 GPI CYB5R3 PIGR
GO:0010952	positive regulation of peptidase activity	biological_process	5	NLRP12 MEFV HMGB1 HIP1 F2R
GO:0043299	leukocyte degranulation	biological_process	13	PIGR TSPAN14 CYB5R3 GPI CD84 SNAP29 SCAMP1 HMGB1 LYZ RAB27A ITGAX LILRB3 ARHGAP45
GO:0004197	cysteine-type endopeptidase activity	molecular_function	8	NLRP12 HMGB1 SERPINB9 MEFV GPI F2R XIAP HIP1
GO:0042734	presynaptic membrane	cellular_component	4	HIP1 SLC6A4 OPRM1 GRM6
GO:0032940	secretion by cell	biological_process	32	SCAMP1 RAB21 FBXL20 HMGB1 GPI CYB5R3 AXL TLR10 LYZ TMF1 TSPAN14 OPRM1 BTN3A2 SLC6A4 CAMK2G NLRP12 SNAP29 CD84 F2R ITGAX LILRB3 GIPR CD109 CYP51A1 ARHGAP45 RAB27A CCL5 TRAF3IP2 PIGR RAB3B CPT1A CHP1
GO:0051607	defense response to virus	biological_process	6	APOBEC3A DTX3L MICB TRAF3IP2 IRF1 IFIT3
GO:0006807	nitrogen compound metabolic process	biological_process	189	ATF6 MRPL30 POLH ADAT1 ELMSAN1 GPI SGPP2 SMAD9 RTCA RBM41 GALNT15 ERAP2 XIAP TERF2 NLRP12 TRMT2B CYP51A1 ZNF530 DSEL ZNF665 P3H4 RBBP5 PIGC DCAF7 TADA3 ZNF114 AK1 ZNF805 RBMS2 FUT3 LDLR EEF2K PGAM5 SPTLC2 TMF1 ZNF793 DCAF16 UBOX5 WDR45 ZNF554 SBNO1 SPIB SERPINB9 ZNF454 XPNPEP3 ZNF543 SLC25A15 GCLM SPRED1 GOLGA2 CHP1 GLTP LSM11 HMGB1 TRIM58 KPNA6 PNPO IRF1 ZRANB3 ZNF490 CIAO1 ZNF426 TRIM52 UBE2G2 …
GO:0070997	neuron death	biological_process	9	NMNAT1 CCL5 GCLM GPI TIGAR F2R CHP1 AXL REL
GO:1990138	neuron projection extension	biological_process	4	SEMA3E RAB21 SEMA4F RNF157
GO:0050709	negative regulation of protein secretion	biological_process	4	F2R OPRM1 CYP51A1 NLRP12
GO:0045666	positive regulation of neuron differentiation	biological_process	8	EEF2K CAMK1D RNF157 CRX ABL2 SCARF1 PTK6 RAB21
GO:0007264	small GTPase mediated signal transduction	biological_process	12	RAB27A ARHGAP45 F2R ARHGAP26 RASGRP4 PLEKHG5 RAB21 PHACTR4 CHP1 ARFIP2 RAB3B ABL2
GO:1903707	negative regulation of hemopoiesis	biological_process	4	JAK3 LILRB3 IRF1 HMGB1
GO:0002446	neutrophil mediated immunity	biological_process	12	RAB27A LYZ LILRB3 ITGAX ARHGAP45 TSPAN14 GPI CYB5R3 PIGR SCAMP1 SNAP29 HMGB1
GO:0005764	lysosome	cellular_component	16	ATP6V0A2 KIAA1324 PIGR ECE1 LYZ BORCS7 RUBCN RAB27A IDS ARHGAP45 AP5B1 LDLR CYB5R3 SNAP29 AP1S3 DTX3L
GO:0007411	axon guidance	biological_process	6	DPYSL5 SEMA4F ISPD FZD3 KIF3A SEMA3E
GO:0097485	neuron projection guidance	biological_process	6	ISPD SEMA4F DPYSL5 SEMA3E KIF3A FZD3
GO:0005768	endosome	cellular_component	21	RAB27A RUBCN JAK3 LDLR F2R SCAMP1 RAB21 DTX3L HMGB1 ATP6V0A2 KIAA1324 VPS53 DGKH PLEKHB2 OPRM1 RAB3B SLC6A4 ECE1 SLC31A1 LRAT AP4S1
GO:1903034	regulation of response to wounding	biological_process	4	F2R SCARF1 KREMEN1 CD109
GO:0005667	transcription factor complex	cellular_component	8	GTF2H5 TAF8 SMAD9 REL TCF7 ELMSAN1 TADA3 ARNTL2
GO:0007204	positive regulation of cytosolic calcium ion concentration	biological_process	7	SPPL3 GIPR CCR6 ABL2 F2R LETM1 HMGB1
GO:0005267	potassium channel activity	molecular_function	4	KCNJ5 KCNH6 CHP1 KCNA7
GO:0005912	adherens junction	cellular_component	12	CHP1 UBOX5 FMN1 OPRM1 FBLIM1 SHROOM1 RAB21 CD99 SNTB2 ARHGAP26 LIMS1 LPP
GO:0043523	regulation of neuron apoptotic process	biological_process	5	F2R GPI AXL NMNAT1 GCLM
GO:0008289	lipid binding	molecular_function	15	LRAT ARFIP2 PLEKHB2 APOL1 GLTP WDR45 AKR1D1 HMGB1 RASGRP4 GSDMB DBT ARHGAP26 AXL GSDMA HIP1
GO:0015079	potassium ion transmembrane transporter activity	molecular_function	5	KCNA7 SLC12A6 KCNJ5 CHP1 KCNH6
GO:0001726	ruffle	cellular_component	4	ARFIP2 PTK6 MEFV ARHGAP45
GO:0006163	purine nucleotide metabolic process	biological_process	9	AK1 PGM2L1 ACSL6 PDP2 AK3 TIGAR GPI PDE4C PIPOX
GO:0032446	protein modification by small protein conjugation	biological_process	19	GOLGA2 CHP1 XIAP DCAF7 DCAF10 RNF14 RNF41 UBE2G2 FBXL18 UBOX5 RNF157 DCAF16 PEX13 RLIM FBXO6 DTX3L FBXL20 ZNF451 TRIM58
GO:0048469	cell maturation	biological_process	4	TRIM58 SCARF1 CCR6 AXL
GO:0002792	negative regulation of peptide secretion	biological_process	4	NLRP12 CYP51A1 OPRM1 F2R
GO:0048511	rhythmic process	biological_process	6	OPRM1 CRX CPT1A SLC6A4 ARNTL2 AXL
GO:0031668	cellular response to extracellular stimulus	biological_process	6	BRIP1 AXL KIAA1324 WDR45 ATG14 NUAK2
GO:0043270	positive regulation of ion transport	biological_process	6	GRM6 CHP1 SLC6A4 F2R RAB3B CCL5
GO:0030695	GTPase regulator activity	molecular_function	7	ARHGAP45 TBC1D24 RUNDC1 TBC1D15 PGAM5 SGSM1 ARHGAP26
GO:0006820	anion transport	biological_process	13	SLC4A8 CPT1A SLC6A4 SLC26A4 GLTP APOL1 SLC43A2 SFXN1 LDLR CLCC1 SLC12A6 SLC25A15 SLC35B4
GO:0032259	methylation	biological_process	8	GAMT SMYD4 INMT BCDIN3D RBBP5 METTL21A TRMT2B RAB3B
GO:0005840	ribosome	cellular_component	6	PNPT1 RPL36A DNAJC21 MRPL30 RBM3 MTG2
GO:0008361	regulation of cell size	biological_process	4	RAB21 SEMA3E SLC12A6 SEMA4F
GO:0007584	response to nutrient	biological_process	5	GCLM LRAT GIPR SLC6A4 BRIP1
GO:0006909	phagocytosis	biological_process	6	RUBCN RAB27A AXL LDLR CAMK1D HMGB1
GO:0048771	tissue remodeling	biological_process	4	AXL HMGB1 P3H4 F2R
GO:0002250	adaptive immune response	biological_process	11	ERAP2 BTN3A2 CCR6 PAG1 HMGB1 MICB CD84 IRF1 JAK3 LILRB3 RAB27A
GO:0070372	regulation of ERK1 and ERK2 cascade	biological_process	7	CCL22 SPRED1 F2R OPRM1 HMGB1 NLRP12 CCL5
GO:0006974	cellular response to DNA damage stimulus	biological_process	18	ZMAT3 SMG1 XIAP TONSL ZNF652 BRIP1 SPRED1 RBBP5 GTF2H5 FBXO6 ZRANB3 TIGAR CBX5 TERF2 DTX3L MDM4 HMGB1 POLH
GO:0050769	positive regulation of neurogenesis	biological_process	10	FZD3 PTK6 RAB21 EEF2K CAMK1D OPRM1 RNF157 SCARF1 ABL2 CRX
GO:0017157	regulation of exocytosis	biological_process	5	RAB21 FBXL20 RAB27A CD84 RAB3B
GO:0051640	organelle localization	biological_process	14	RAB27A C17ORF75 PEX13 AP3S2 TRIM58 CD84 FBXL20 SNAP29 KIF3A ATG14 HOOK3 GOLGA2 KIF1C RAB3B
GO:0060548	negative regulation of cell death	biological_process	22	RNF157 DFFA CCL5 GCLM NMNAT1 TMF1 IFIT3 XIAP TIGAR GPI EEF2K F2R CAMK1D SERPINB9 MDM4 REL NUAK2 TCF7 FZD3 JAK3 AXL IDO1
GO:0008152	metabolic process	biological_process	219	ZNF514 MDM4 FBXO6 SUGP2 LRAT THAP5 ISPD PPIL6 ANKRD16 MRI1 AKR1D1 ATG14 CHST6 ENTPD4 ISG20L2 PLEKHG5 MEAF6 ZDHHC3 AXL DTD2 DCAF10 PGPEP1 CCR6 SMYD4 PLCXD1 SNAP29 DBT QPRT CBX5 JAK3 DCP1A CYP8B1 PPP1R12B FMN1 ZNF652 NKD1 PDP2 FBXL20 MGAT4A TRIM65 RASGRP4 ZNF91 MBOAT1 FAM161A PGM2L1 NOL9 GAMT CCL22 METTL21A NMT2 TSPAN14 OPRM1 SFXN1 RRP7A PHACTR4 GALNT4 CRX F2R CD109 IDO1 NUAK2 ZFP82 APOBEC3A ZHX3 D…
GO:0019904	protein domain specific binding	molecular_function	15	ARFIP2 TADA3 DFFA FMN1 ICA1L OPRM1 RNF41 AKAP5 CEP68 PAG1 NKD1 ZNF106 CRX FZD3 RAB27A
GO:0070663	regulation of leukocyte proliferation	biological_process	6	CCL5 JAK3 IDO1 HMGB1 IKZF3 IRF1
GO:0044242	cellular lipid catabolic process	biological_process	5	PEX13 ACER3 GDPD1 LDLR CPT1A
GO:0051046	regulation of secretion	biological_process	17	GIPR CYP51A1 TLR10 RAB27A FBXL20 RAB21 NLRP12 HMGB1 GPI F2R CD84 CCL5 TMF1 OPRM1 CPT1A SLC6A4 RAB3B
GO:0010975	regulation of neuron projection development	biological_process	10	SEMA3E RAB21 PTK6 KREMEN1 SCARF1 ABL2 SEMA4F RNF157 CAMK1D EEF2K
GO:0002274	myeloid leukocyte activation	biological_process	15	ARHGAP45 ITGAX LILRB3 LYZ RAB27A HMGB1 SNAP29 SCAMP1 CD84 LDLR CYB5R3 GPI CCL5 PIGR TSPAN14
GO:0099568	cytoplasmic region	cellular_component	10	ATG14 KIF3A HIP1 SHROOM1 KIF1C OPRM1 AP3S2 ARFIP2 RAB21 TERF2
GO:0035821	modification of morphology or physiology of other organism	biological_process	4	SERPINB9 CCL5 APOL1 LYZ
GO:0042098	T cell proliferation	biological_process	5	IDO1 HMGB1 IRF1 CCL5 JAK3
GO:0004713	protein tyrosine kinase activity	molecular_function	5	ABL2 PTK6 CCL5 JAK3 AXL
GO:0022406	membrane docking	biological_process	4	RAB3B ATG14 CHP1 SNAP29
GO:0016072	rRNA metabolic process	biological_process	5	GTF2H5 NOL9 ISG20L2 RRP7A DIS3L
GO:0050729	positive regulation of inflammatory response	biological_process	4	IDO1 NLRP12 TLR10 LDLR
GO:0071805	potassium ion transmembrane transport	biological_process	5	KCNH6 CHP1 KCNJ5 SLC12A6 KCNA7
GO:0006082	organic acid metabolic process	biological_process	23	CPT1A CYP8B1 GCLM AKR1D1 CHST6 PDP2 CHP1 MRI1 QPRT DBT DSEL ACSL6 IDO1 PEX13 PIPOX NMNAT1 CYB5R3 GPI TIGAR ME2 IDS GAMT PGM2L1
GO:0050767	regulation of neurogenesis	biological_process	16	KREMEN1 PTK6 RAB21 EEF2K CAMK1D LDLR SEMA4F SCARF1 CRX FZD3 SLC6A4 OPRM1 RNF157 ABL2 HOOK3 SEMA3E
GO:0004620	phospholipase activity	molecular_function	4	ABL2 CCL5 GDPD1 RASGRP4
GO:0015980	energy derivation by oxidation of organic compounds	biological_process	6	ME2 TIGAR PPP1R3B PGM2L1 PNPT1 LYRM7
GO:0051604	protein maturation	biological_process	6	TSPAN14 ECE1 XIAP SPPL3 XPNPEP3 CIAO1
GO:0006887	exocytosis	biological_process	19	LILRB3 ITGAX ARHGAP45 CD109 LYZ RAB27A SNAP29 FBXL20 SCAMP1 RAB21 HMGB1 CYB5R3 GPI CD84 CHP1 CCL5 PIGR TSPAN14 RAB3B
GO:0030136	clathrin-coated vesicle	cellular_component	5	SCAMP1 ECE1 HIP1 LDLR RAB27A
GO:0031669	cellular response to nutrient levels	biological_process	5	BRIP1 KIAA1324 ATG14 WDR45 NUAK2
GO:0019752	carboxylic acid metabolic process	biological_process	21	PEX13 IDO1 ACSL6 DSEL QPRT DBT MRI1 CHP1 PDP2 AKR1D1 GCLM CYP8B1 CPT1A PGM2L1 GAMT ME2 TIGAR CYB5R3 GPI NMNAT1 PIPOX
GO:0043433	negative regulation of DNA-binding transcription factor activity	biological_process	4	TONSL RLIM CHP1 NLRP12
GO:0016705	oxidoreductase activity, acting on paired donors, with incorporation or reduction of molecular oxygen	molecular_function	5	CYP51A1 CYP8B1 TERF2 AGMO AKR1D1
GO:0045926	negative regulation of growth	biological_process	6	SEMA4F SLC6A4 PTK6 PNPT1 SEMA3E NKD1
GO:0034645	cellular macromolecule biosynthetic process	biological_process	91	ZNF655 ZNF793 IKZF3 TMF1 ZNF554 WDR45 SBNO1 FUT3 LIMS1 CAMK1D EEF2K TAF8 REL ZHX3 CHP1 GOLGA2 GALNT4 SPIB CRX F2R ZNF454 ZFP82 ZNF543 OR7D2 RNF14 ARNTL2 XIAP ATF6 POLH MRPL30 ZNF124 ELMSAN1 RLIM SMAD9 GALNT15 ZNF665 PIGC ZNF529 MTFMT TADA3 ZNF114 ZNF805 ZKSCAN1 POFUT1 NLRP12 TERF2 UGGT1 GTF2H5 TOX4 ZNF530 DSEL TCF7 RNF41 PPP1R3B DTX3L RBM3 FOXK1 ZDHHC3 FUT2 ARGFX THAP5 ISPD RPL36A MTG2 ZNF514 MDM…
GO:0043123	positive regulation of I-kappaB kinase/NF-kappaB signaling	biological_process	4	PLEKHG5 TRAF3IP2 REL F2R
GO:0005819	spindle	cellular_component	7	KIF3A CIAO1 GOLGA2 FAM161A KIF18B TADA3 SKA1
GO:0043122	regulation of I-kappaB kinase/NF-kappaB signaling	biological_process	5	NLRP12 PLEKHG5 TRAF3IP2 REL F2R
GO:0099512	supramolecular fiber	cellular_component	19	REEP3 SNTB2 KIF18B TUBD1 FAM161A NUDC SKA1 IDO1 TPM3 PSTPIP2 SHROOM1 PPP1R12B FMN1 MEFV KIF3A GAS2L3 KIF1C GOLGA2 HOOK3
GO:0042803	protein homodimerization activity	molecular_function	17	GBP4 XPNPEP3 HIP1 ACSL6 PNPO QPRT CBX5 TERF2 GRM6 SPPL3 CAMK2G ECE1 SLC6A4 CCL5 ZHX3 IKZF3 ISPD
GO:0030003	cellular cation homeostasis	biological_process	13	F2R HMGB1 PDE6A GIPR ABL2 SLC4A8 CCL5 SLC31A1 LETM1 ATP6V0A2 CCR6 CHP1 SPPL3
GO:0051259	protein complex oligomerization	biological_process	12	PNPT1 QPRT LIMS1 CAMK2G DGKH CHP1 GOLGA2 KCNA7 CPT1A SLC6A4 LETM1 CCL5
GO:1901796	regulation of signal transduction by p53 class mediator	biological_process	4	MDM4 MEAF6 SPRED1 BRIP1
GO:0006164	purine nucleotide biosynthetic process	biological_process	4	PDP2 AK3 AK1 ACSL6
GO:0042594	response to starvation	biological_process	4	NUAK2 ATG14 WDR45 KIAA1324
GO:0050768	negative regulation of neurogenesis	biological_process	6	SEMA3E HOOK3 SLC6A4 LDLR SEMA4F KREMEN1
GO:0070371	ERK1 and ERK2 cascade	biological_process	7	CCL22 OPRM1 F2R SPRED1 CCL5 NLRP12 HMGB1
GO:0050662	coenzyme binding	molecular_function	6	ME2 ALDH1B1 DBT CYB5R3 PNPO SPTLC2
GO:0007623	circadian rhythm	biological_process	4	CRX CPT1A SLC6A4 ARNTL2
GO:0050821	protein stabilization	biological_process	4	HIP1 MTMR9 MDM4 CHP1
GO:0005515	protein binding	molecular_function	215	ZBTB8A SLC31A1 CLUAP1 XIAP CD82 ARHGAP26 GPI ELMSAN1 ATF6 SCAMP1 POLH LYRM7 RBM41 SMAD9 MTMR9 TADA3 RBBP5 DCAF7 ZNF114 TRMT2B CD84 CD99 NLRP12 TERF2 RUNDC1 DCAF16 UBOX5 UBIAD1 TMF1 PLXDC1 WDR45 LDLR EEF2K RAB21 MICB GBP4 PGAM5 TUFT1 SPRED1 GCLM IFIT3 ATP6V0A2 GLTP GOLGA2 CHP1 LPP DSG2 SERPINB9 DCTN5 XPNPEP3 ZNF543 NRIP3 ZNF426 UBE2G2 TNFAIP8L1 APOL1 SLC14A2 TONSL CAMK2G TRIM58 CYB5R3 KPNA6 LSM11 …
GO:0031301	integral component of organelle membrane	cellular_component	9	ENTPD4 SPPL3 SFXN1 PEX13 SLC35B4 CPT1A UBIAD1 ATF6 ACER3
GO:0046903	secretion	biological_process	33	CYP51A1 ARHGAP45 CD109 ITGAX LILRB3 GIPR RAB27A SNAP29 NLRP12 F2R CD84 CHP1 COPA TRAF3IP2 CCL5 CPT1A RAB3B PIGR AXL LYZ TLR10 HMGB1 RAB21 SCAMP1 FBXL20 GPI CYB5R3 CAMK2G TMF1 SLC6A4 BTN3A2 OPRM1 TSPAN14
GO:0070374	positive regulation of ERK1 and ERK2 cascade	biological_process	5	CCL5 HMGB1 CCL22 OPRM1 F2R
GO:0017016	Ras GTPase binding	molecular_function	9	KIF3A TBC1D15 RUNDC1 SGSM1 SLC6A4 ARFIP2 RNF41 RASGRP4 PLEKHG5
GO:0005654	nucleoplasm	cellular_component	66	ZHX3 MRI1 SMG1 TRIM45 SERPINB9 MDM4 LSG1 NUDC SUGP2 DCTN5 IKZF3 DCAF10 NMNAT1 UBOX5 DFFA DCAF16 UBN2 FAM9B ZMAT3 DTX3L FOXK1 RBM3 ISG20L2 MEAF6 TAF8 REL DCAF7 RBBP5 TADA3 BRIP1 PPP1R12B TERF2 SNAP29 ZNF451 CBX5 TUBD1 GTF2H5 TCF7 TRIM52 CLUAP1 METTL21A ALDH1B1 CAMK2G RRP7A TONSL XIAP ANKRD12 TRIM65 POLH HMGB1 LSM11 ATF6 PTK6 ZNF106 KPNA6 KIF18B ELMSAN1 GPI C4ORF19 RLIM SMAD9 IRF1 NOL9 PNPO RTCA RU…
GO:0035639	purine ribonucleoside triphosphate binding	molecular_function	35	UBE2G2 NMNAT1 AK3 KIF3A DGKH CAMK2G CAMK1D KIF18B EEF2K GK5 RAB21 PTK6 SPATA5 GBP4 RTCA AXL ZRANB3 NOL9 ARFIP2 GRK3 RAB3B BRIP1 ABL2 KIF1C AK1 SMG1 LSG1 TUBD1 NLRP12 MTG2 NUAK2 RAB27A IRGQ ACSL6 JAK3
GO:0071478	cellular response to radiation	biological_process	4	GTF2H5 NMT2 POLH PDE6A
GO:0048638	regulation of developmental growth	biological_process	7	RNF157 SEMA4F SLC6A4 RAB21 GAMT SEMA3E NKD1
GO:0016042	lipid catabolic process	biological_process	7	GDPD1 ACER3 SCARF1 LDLR CPT1A PEX13 AKR1D1
GO:0007596	blood coagulation	biological_process	7	RAB27A AK3 IRF1 AXL DGKH CBX5 F2R
GO:0008234	cysteine-type peptidase activity	molecular_function	9	XIAP HIP1 NLRP12 HMGB1 SERPINB9 MEFV GPI F2R PGPEP1
GO:0031252	cell leading edge	cellular_component	8	PHACTR4 ARHGAP45 OPRM1 ARFIP2 PTK6 AKAP5 MEFV PLEKHG5
GO:0030139	endocytic vesicle	cellular_component	8	CAMK2G HIP1 ATP6V0A2 ATG14 PLEKHG5 HEATR5A SCARF1 LDLR
GO:0006281	DNA repair	biological_process	11	SMG1 TONSL BRIP1 GTF2H5 FBXO6 ZRANB3 TERF2 DTX3L HMGB1 POLH TIGAR
GO:0030595	leukocyte chemotaxis	biological_process	5	CCR6 CCL5 HMGB1 CCL22 CAMK1D
GO:1903531	negative regulation of secretion by cell	biological_process	5	OPRM1 F2R CD84 NLRP12 CYP51A1
GO:0004857	enzyme inhibitor activity	molecular_function	8	CHP1 XIAP CD109 SERPINB9 DTX3L PPP1R12B DFFA SPRED1
GO:0006873	cellular ion homeostasis	biological_process	13	HMGB1 F2R GIPR PDE6A CCL5 SLC31A1 LETM1 SLC4A8 ABL2 CHP1 CCR6 SPPL3 ATP6V0A2
GO:0048037	cofactor binding	molecular_function	10	CYP8B1 ME2 BRIP1 ALDH1B1 DBT CYB5R3 IDO1 CYP51A1 PNPO SPTLC2
GO:0071453	cellular response to oxygen levels	biological_process	5	EEF2K BRIP1 TIGAR ATP6V0A2 MDM4
GO:0030217	T cell differentiation	biological_process	5	IRF1 HMGB1 JAK3 CCR6 TCF7
GO:0051402	neuron apoptotic process	biological_process	5	GPI F2R GCLM NMNAT1 AXL
GO:0006874	cellular calcium ion homeostasis	biological_process	9	LETM1 CCL5 HMGB1 ABL2 F2R SPPL3 GIPR CCR6 PDE6A
GO:0050817	coagulation	biological_process	7	DGKH AXL IRF1 AK3 RAB27A F2R CBX5
GO:0050708	regulation of protein secretion	biological_process	10	CYP51A1 GIPR TLR10 HMGB1 CCL5 NLRP12 CPT1A F2R OPRM1 GPI
GO:0043067	regulation of programmed cell death	biological_process	31	EEF2K CAMK1D TIGAR GPI HMGB1 PLEKHG5 ATF6 AXL DFFA RNF157 TMF1 IKZF3 NMNAT1 ZMAT3 TNFAIP8L1 XIAP F2R PNMA2 SERPINB9 MDM4 NLRP12 TCF7 FZD3 HIP1 NUAK2 IDO1 JAK3 ACER3 IFIT3 GCLM CCL5
GO:0006897	endocytosis	biological_process	11	RAB21 HEATR5A EEF2K SCARF1 LDLR AXL HIP1 RUBCN GRK3 ABL2 APOL1
GO:0042393	histone binding	molecular_function	4	CBX5 DTX3L TONSL RBBP5
GO:0032555	purine ribonucleotide binding	molecular_function	36	KIF1C SMG1 AK1 BRIP1 RAB3B ARFIP2 GRK3 ABL2 JAK3 ACSL6 IRGQ NUAK2 RAB27A MTG2 NLRP12 LSG1 TUBD1 CAMK2G DGKH AK3 KIF3A UBE2G2 NMNAT1 ZRANB3 AXL NOL9 SPATA5 RTCA GBP4 GK5 PTK6 RAB21 EEF2K KIF18B CAMK1D CYB5R3
GO:0009314	response to radiation	biological_process	9	GTF2H5 ZRANB3 GRM6 PDE6A CABP4 POLH NMT2 OPRM1 TIGAR
GO:0002366	leukocyte activation involved in immune response	biological_process	15	LYZ RAB27A JAK3 ITGAX LILRB3 ARHGAP45 GPI CYB5R3 CD84 SNAP29 SCAMP1 HMGB1 CCR6 PIGR TSPAN14
GO:0003714	transcription corepressor activity	molecular_function	5	ZNF451 ZHX3 TONSL HOMEZ RLIM
GO:0000775	chromosome, centromeric region	cellular_component	4	MEAF6 DCTN5 CBX5 SKA1
GO:0030141	secretory granule	cellular_component	17	CD109 ARHGAP45 ITGAX LILRB3 RAB27A LYZ HMGB1 SCAMP1 SNAP29 GPI CYB5R3 ATP6V0A2 RAB3B ECE1 TSPAN14 PIGR ICA1L
GO:0007281	germ cell development	biological_process	5	CCR6 FAM9B TMF1 ICA1L BRIP1
GO:0052548	regulation of endopeptidase activity	biological_process	9	HIP1 XIAP CD109 GPI F2R NLRP12 SERPINB9 MEFV HMGB1
GO:0002263	cell activation involved in immune response	biological_process	15	PIGR TSPAN14 CCR6 HMGB1 SNAP29 SCAMP1 CD84 CYB5R3 GPI ARHGAP45 JAK3 ITGAX LILRB3 LYZ RAB27A
GO:0046390	ribose phosphate biosynthetic process	biological_process	4	PDP2 AK3 AK1 ACSL6
GO:0042180	cellular ketone metabolic process	biological_process	5	UBIAD1 PDP2 CPT1A GPI IDO1
GO:0019899	enzyme binding	molecular_function	41	GPI ATF6 RASGRP4 HMGB1 TSPAN14 METTL21A RNF14 PHACTR4 CBX5 DBT SGSM1 TERF2 JAK3 TBC1D15 RUNDC1 MTMR9 PPP1R12B AKAP5 LDLR LIMS1 DTX3L PLEKHG5 SLC6A4 UBOX5 RNF41 KIF3A WDR45 PPP1R3B SERPINB9 MDM4 TOR1AIP2 SPRED1 ARFIP2 GCLM THAP5 DIS3L ATG14 ATP6V0A2 CEP68 GOLGA2 CHP1
GO:0017076	purine nucleotide binding	molecular_function	36	RAB3B ARFIP2 GRK3 BRIP1 ABL2 KIF1C SMG1 AK1 MTG2 NLRP12 LSG1 TUBD1 ACSL6 JAK3 NUAK2 RAB27A IRGQ UBE2G2 NMNAT1 CAMK2G DGKH AK3 KIF3A GK5 RAB21 PTK6 CAMK1D EEF2K KIF18B CYB5R3 AXL ZRANB3 NOL9 SPATA5 RTCA GBP4
GO:0030001	metal ion transport	biological_process	18	OPRM1 KCNA7 SLC6A4 SLC4A8 KCNJ5 LETM1 SLC31A1 CCL5 GRM6 ATP6V0A2 SFXN1 CHP1 ORAI2 CAMK2G CD84 F2R SLC12A6 KCNH6
GO:0031267	small GTPase binding	molecular_function	9	ARFIP2 SGSM1 SLC6A4 RNF41 RASGRP4 PLEKHG5 KIF3A RUNDC1 TBC1D15
GO:0006091	generation of precursor metabolites and energy	biological_process	10	GIPR PGM2L1 IDO1 LYRM7 PNPT1 GPI TIGAR ME2 PPP1R3B ALDH1B1
GO:0099003	vesicle-mediated transport in synapse	biological_process	4	SNAP29 FBXL20 AP3S2 RAB27A
GO:0042581	specific granule	cellular_component	4	LYZ TSPAN14 RAB27A SCAMP1
GO:0070382	exocytic vesicle	cellular_component	4	SCAMP1 SVOP RAB27A RAB3B
GO:0031253	cell projection membrane	cellular_component	7	ARHGAP45 PDE6A SLC26A4 SNAP29 AKAP5 OPRM1 GPI
GO:0042110	T cell activation	biological_process	10	PAG1 RAB27A TCF7 JAK3 CCR6 IRF1 IDO1 CCL5 HMGB1 MICB
GO:0031396	regulation of protein ubiquitination	biological_process	4	DTX3L XIAP GOLGA2 CHP1
GO:0006813	potassium ion transport	biological_process	5	SLC12A6 KCNH6 CHP1 KCNA7 KCNJ5
GO:0055114	oxidation-reduction process	biological_process	21	TERF2 PEX13 CYP51A1 IDO1 ABL2 CPT1A CYP8B1 AKR1D1 PDP2 TIGAR CYB5R3 GPI ME2 LYRM7 PNPT1 PNPO PGM2L1 ALDH1B1 PIPOX AGMO PPP1R3B
GO:0030163	protein catabolic process	biological_process	18	RLIM CYP51A1 FBXO6 PLEKHG5 DTX3L MDM4 FBXL20 UGGT1 SGTB LDLR TRIM58 NKD1 UBE2G2 RNF41 RNF14 TMF1 FBXL18 CLN8
GO:0007162	negative regulation of cell adhesion	biological_process	6	HMGB1 SEMA3E JAK3 IDO1 IRF1 PAG1
GO:0055074	calcium ion homeostasis	biological_process	9	HMGB1 CCL5 LETM1 F2R ABL2 CCR6 GIPR SPPL3 PDE6A
GO:0006875	cellular metal ion homeostasis	biological_process	11	SLC31A1 LETM1 CCL5 ABL2 SPPL3 CCR6 ATP6V0A2 HMGB1 F2R GIPR PDE6A
GO:0012501	programmed cell death	biological_process	40	TRAF3IP2 ACER3 CCL5 HIP1 TCF7 JAK3 KREMEN1 NLRP12 TNFAIP8L1 XIAP RNF157 IRF1 GPI TIGAR HMGB1 ATF6 DSG3 IFIT3 GCLM FZD3 NUAK2 IDO1 GSDMA F2R DSG2 SERPINB9 MDM4 PNMA2 ZMAT3 DFFA IKZF3 RNF41 TMF1 NMNAT1 AXL PGAM5 CAMK1D EEF2K GSDMB PLEKHG5
GO:0005788	endoplasmic reticulum lumen	cellular_component	6	APOL1 TSPAN14 UGGT1 KDELC2 MGAT4A ERAP2
GO:0043065	positive regulation of apoptotic process	biological_process	13	IDO1 HIP1 ATF6 NLRP12 PNMA2 HMGB1 PLEKHG5 TIGAR F2R CAMK1D ZMAT3 CCL5 DFFA
GO:0030135	coated vesicle	cellular_component	7	HIP1 COPA RAB27A GOLGA2 ECE1 LDLR SCAMP1
GO:0032787	monocarboxylic acid metabolic process	biological_process	12	DSEL IDO1 PEX13 PGM2L1 ACSL6 ME2 GPI TIGAR PDP2 AKR1D1 CPT1A CYP8B1
GO:0034613	cellular protein localization	biological_process	35	AP4S1 AKAP5 RAB3B ARFIP2 PIGR TOR1AIP2 CHP1 SMG1 HOOK3 COPA CEP68 RPL36A TERF2 SGSM1 SGTB DCP1A PEX13 RUNDC1 TBC1D15 HIP1 C17ORF75 RAB27A CLUAP1 UBE2G2 PIPOX TSPAN14 WDR45 KIF3A DTX3L AP1S3 RAB21 KPNA6 AP3S2 ZDHHC3 TAF8
GO:0042981	regulation of apoptotic process	biological_process	30	DFFA RNF157 TMF1 IKZF3 NMNAT1 ZMAT3 TNFAIP8L1 XIAP EEF2K CAMK1D TIGAR GPI HMGB1 PLEKHG5 ATF6 AXL IFIT3 CCL5 GCLM F2R PNMA2 SERPINB9 MDM4 NLRP12 TCF7 HIP1 FZD3 NUAK2 IDO1 JAK3
GO:0002683	negative regulation of immune system process	biological_process	11	HMGB1 MICB SERPINB9 CD84 LDLR IDO1 IRF1 AXL LILRB3 JAK3 PAG1
GO:0016462	pyrophosphatase activity	molecular_function	28	KIF3A METTL21A PGAM5 ZRANB3 GBP4 CCL22 SPATA5 RAB21 ARHGAP26 LIMS1 KIF18B TBC1D24 KIF1C ATP6V0A2 ENTPD4 CCL5 TOR1AIP2 RAB3B BRIP1 RUNDC1 TBC1D15 ARHGAP45 RAB27A MTG2 TUBD1 LSG1 F2R SGSM1
GO:0033993	response to lipid	biological_process	18	PTK6 HMGB1 MICB DSG2 LDLR GPI F2R GIPR AXL IDO1 LRAT CCL5 RNF14 OPRM1 ABL2 CPT1A TADA3 SLC6A4
GO:0034504	protein localization to nucleus	biological_process	5	KPNA6 TOR1AIP2 DTX3L CHP1 TAF8
GO:0015630	microtubule cytoskeleton	cellular_component	22	KIF3A CLUAP1 SHROOM1 CIAO1 SKA1 FAM161A KIF18B HOOK3 GOLGA2 CHP1 KIF1C GAS2L3 CEP68 MEFV DIS3L TADA3 DCTN5 SNAP29 NUDC TUBD1 SNTB2 REEP3
GO:0017111	nucleoside-triphosphatase activity	molecular_function	27	CCL5 RAB3B BRIP1 TOR1AIP2 KIF1C TBC1D24 ATP6V0A2 MTG2 LSG1 F2R SGSM1 TUBD1 ARHGAP45 RUNDC1 TBC1D15 RAB27A METTL21A KIF3A RAB21 KIF18B ARHGAP26 LIMS1 ZRANB3 PGAM5 SPATA5 GBP4 CCL22
GO:0045664	regulation of neuron differentiation	biological_process	12	SEMA4F SCARF1 CRX EEF2K CAMK1D PTK6 RAB21 KREMEN1 SEMA3E RNF157 ABL2 SLC6A4
GO:0006694	steroid biosynthetic process	biological_process	4	AKR1D1 CYB5R3 CYP8B1 CYP51A1
GO:0043068	positive regulation of programmed cell death	biological_process	13	ZMAT3 DFFA CCL5 HIP1 IDO1 F2R CAMK1D TIGAR PNMA2 HMGB1 PLEKHG5 ATF6 NLRP12
GO:0019439	aromatic compound catabolic process	biological_process	12	IDO1 DCP1A PNPT1 HMGB1 PDE4C SMG1 ENTPD4 RPL36A DIS3L NMNAT1 APOBEC3A DFFA
GO:0007049	cell cycle	biological_process	35	KIF18B PTK6 LSM11 SKA1 GOLGA8H GOLGA6C PNPT1 IRF1 SLC6A4 FBXL18 ZNF655 KIF3A PHACTR4 GOLGA8K FAM9B GOLGA8R GOLGA8M NUDC TUBD1 CBX5 REEP3 TERF2 GOLGA8O MDM4 FZD3 FBXO6 PPP1R12B BRIP1 TADA3 P3H4 THAP5 GOLGA8N CEP68 GOLGA8J GOLGA2
GO:0034341	response to interferon-gamma	biological_process	6	CCL22 GBP4 IRF1 MEFV CAMK2G CCL5
GO:0030029	actin filament-based process	biological_process	14	DSG2 ARHGAP26 TPM3 PSTPIP2 SHROOM1 HIP1 NUAK2 KCNJ5 ARFIP2 ABL2 FMN1 GAS2L3 SEMA3E PHACTR4
GO:0006473	protein acetylation	biological_process	4	TADA3 ZNF451 MEAF6 FAM161A
GO:0051924	regulation of calcium ion transport	biological_process	5	CAMK2G CCL5 CD84 F2R GRM6
GO:0009611	response to wounding	biological_process	13	KREMEN1 F2R SCARF1 CBX5 IRF1 AXL CD109 GIPR RAB27A NMNAT1 OPRM1 DGKH AK3
GO:0006898	receptor-mediated endocytosis	biological_process	6	APOL1 HIP1 GRK3 LDLR SCARF1 RAB21
GO:0045055	regulated exocytosis	biological_process	16	HMGB1 SNAP29 SCAMP1 FBXL20 CD84 GPI CYB5R3 ARHGAP45 CD109 ITGAX LILRB3 LYZ RAB27A PIGR TSPAN14 CHP1
GO:0030073	insulin secretion	biological_process	4	CAMK2G CCL5 GIPR CPT1A
GO:0055037	recycling endosome	cellular_component	4	PLEKHB2 VPS53 SCAMP1 SLC31A1
GO:0007266	Rho protein signal transduction	biological_process	4	ABL2 PHACTR4 F2R PLEKHG5
GO:0006612	protein targeting to membrane	biological_process	4	SGTB ZDHHC3 RPL36A CHP1
GO:0042277	peptide binding	molecular_function	8	ERAP2 LDLR OPRM1 ECE1 KPNA6 LILRB3 PPIL6 GIPR
GO:0048471	perinuclear region of cytoplasm	cellular_component	13	GBP4 TSNAX TAF8 GSDMA LIMS1 GALNT4 PLEKHG5 VPS53 RAB3B ECE1 LRAT RNF41 GDPD1
GO:0038061	NIK/NF-kappaB signaling	biological_process	4	REL LIMS1 NLRP12 HMGB1
GO:0015077	monovalent inorganic cation transmembrane transporter activity	molecular_function	9	KCNA7 SLC6A4 SLC4A8 KCNJ5 LETM1 ATP6V0A2 SLC12A6 CHP1 KCNH6
GO:0003677	DNA binding	molecular_function	46	ZNF454 ZNF543 ZFP82 SPIB ZNF514 CRX SMG1 ZBP1 THAP5 ZHX3 ARGFX REL FOXK1 ZNF554 ZNF793 IKZF3 TMF1 ZNF655 GTF2H5 TCF7 TSNAX TOX4 ZNF530 TERF2 ZNF451 ZNF805 ZNF114 ZKSCAN1 RBBP5 ZNF665 BRIP1 ZNF652 ZNF529 SMAD9 IRF1 ZNF490 ZNF91 HMGB1 POLH ZNF124 ATF6 ELMSAN1 HOMEZ ZNF426 ZBTB8A ARNTL2
GO:0015711	organic anion transport	biological_process	9	GLTP SLC25A15 SLC43A2 SFXN1 SLC35B4 LDLR CPT1A SLC4A8 SLC26A4
GO:0009416	response to light stimulus	biological_process	6	CABP4 POLH NMT2 ZRANB3 GRM6 PDE6A
GO:0030666	endocytic vesicle membrane	cellular_component	5	LDLR ATP6V0A2 SCARF1 HIP1 CAMK2G
GO:0048762	mesenchymal cell differentiation	biological_process	4	SEMA3E LIMS1 SEMA4F PHACTR4
GO:0031346	positive regulation of cell projection organization	biological_process	7	PTK6 RAB21 RNF157 SCARF1 ABL2 EEF2K CAMK1D
GO:0005740	mitochondrial envelope	cellular_component	14	LETM1 UBIAD1 CPT1A SFXN1 MTG2 MRPL30 CYB5R3 TIGAR COA7 ACSL6 PGAM5 LYRM7 SLC25A15 PNPT1
GO:0045321	leukocyte activation	biological_process	25	RNF41 IKZF3 TSPAN14 CCR6 PAG1 SCAMP1 MICB HMGB1 LDLR GPI CYB5R3 IRF1 AXL LYZ CCL5 PIGR SNAP29 CD84 JAK3 ITGAX LILRB3 ARHGAP45 IDO1 RAB27A TCF7
GO:0051249	regulation of lymphocyte activation	biological_process	9	JAK3 AXL IRF1 IDO1 PAG1 CCL5 HMGB1 IKZF3 RNF41
GO:0001775	cell activation	biological_process	28	IRF1 AXL LYZ SCAMP1 MICB HMGB1 LDLR GPI CYB5R3 CCR6 DGKH PAG1 RNF41 IKZF3 TSPAN14 JAK3 ITGAX LILRB3 ARHGAP45 IDO1 RAB27A TCF7 SNAP29 F2R CD84 CCL5 GCLM PIGR
GO:0051641	cellular localization	biological_process	52	AP5B1 KPNA6 AP3S2 TRIM58 FBXL20 VPS53 TSPAN14 UBE2G2 CLUAP1 LETM1 HIP1 C17ORF75 DCP1A RUNDC1 TBC1D15 CD84 SGSM1 SGTB TERF2 SNAP29 KIF1C CPT1A PIGR AKAP5 TAF8 LDLR ZDHHC3 DTX3L RAB21 HEATR5A AP1S3 WDR45 KIF3A PIPOX SLC6A4 DCTN5 RAB27A PEX13 LSG1 F2R CEP68 COPA RPL36A ATG14 CHP1 SMG1 GOLGA2 HOOK3 RAB3B ARFIP2 TOR1AIP2 AP4S1
GO:0006869	lipid transport	biological_process	7	LDLR CLN8 CPT1A LRAT TMF1 GLTP APOL1
GO:0002685	regulation of leukocyte migration	biological_process	4	HMGB1 CCR6 CCL5 CAMK1D
GO:0046651	lymphocyte proliferation	biological_process	6	HMGB1 IKZF3 CCL5 IDO1 IRF1 JAK3
GO:0033218	amide binding	molecular_function	9	GLTP GIPR PPIL6 LILRB3 OPRM1 LDLR KPNA6 ECE1 ERAP2
GO:0022843	voltage-gated cation channel activity	molecular_function	4	KCNH6 KCNJ5 KCNA7 OPRM1
GO:1902494	catalytic complex	cellular_component	26	GTF2H5 FBXO6 TOX4 DBT CBX5 ZNF451 NKD1 ATG14 P3H4 GCLM RBBP5 DCAF7 PIGC DIS3L TADA3 TAF8 PNPT1 SPTLC2 FBXL20 MEAF6 ELMSAN1 PPP1R3B FBXL18 DCAF10 RNF14 DCAF16
GO:0010498	proteasomal protein catabolic process	biological_process	9	FBXO6 SGTB UGGT1 FBXL20 FBXL18 RNF41 UBE2G2 TMF1 RNF14
GO:0032943	mononuclear cell proliferation	biological_process	6	IKZF3 HMGB1 CCL5 IRF1 IDO1 JAK3
GO:0052547	regulation of peptidase activity	biological_process	9	CD109 XIAP HIP1 MEFV SERPINB9 HMGB1 NLRP12 F2R GPI
GO:0010941	regulation of cell death	biological_process	33	NMNAT1 TMF1 IKZF3 RNF157 DFFA XIAP TNFAIP8L1 ZMAT3 ATF6 HMGB1 PLEKHG5 TIGAR GPI EEF2K CAMK1D AXL REL GCLM CCL5 ACER3 IFIT3 CHP1 NLRP12 PNMA2 SERPINB9 MDM4 F2R JAK3 IDO1 NUAK2 TCF7 HIP1 FZD3
GO:0008144	drug binding	molecular_function	32	NLRP12 NUAK2 JAK3 ACSL6 BRIP1 GRK3 ABL2 CYP8B1 KIF1C SMG1 AK1 PPIL6 EEF2K KIF18B CAMK1D CYB5R3 GK5 PTK6 SPATA5 SPTLC2 RTCA AXL ZRANB3 NOL9 PNPO SLC6A4 UBE2G2 NMNAT1 AK3 KIF3A CAMK2G DGKH
GO:0046873	metal ion transmembrane transporter activity	molecular_function	11	CHP1 ORAI2 KCNJ5 SLC31A1 LETM1 OPRM1 KCNA7 SLC6A4 SLC4A8 KCNH6 SLC12A6
GO:0005929	cilium	cellular_component	11	CCR6 ATG14 KIF3A CLUAP1 PDE6A RAB27A SNAP29 PDE4C TUBD1 FAM161A GPI
GO:0002521	leukocyte differentiation	biological_process	10	IRF1 AXL CD109 JAK3 CCR6 LILRB3 TCF7 IKZF3 HMGB1 RNF41
GO:0006364	rRNA processing	biological_process	4	ISG20L2 GTF2H5 NOL9 RRP7A
GO:0016485	protein processing	biological_process	4	SPPL3 XIAP XPNPEP3 ECE1
GO:0051048	negative regulation of secretion	biological_process	5	F2R CD84 OPRM1 CYP51A1 NLRP12
GO:0006260	DNA replication	biological_process	5	TERF2 POLH BRIP1 TONSL ZRANB3
GO:0030036	actin cytoskeleton organization	biological_process	12	ARHGAP26 HIP1 NUAK2 TPM3 PSTPIP2 SHROOM1 ARFIP2 ABL2 FMN1 PHACTR4 GAS2L3 SEMA3E
GO:0045665	negative regulation of neuron differentiation	biological_process	4	SLC6A4 SEMA4F KREMEN1 SEMA3E
GO:0044262	cellular carbohydrate metabolic process	biological_process	5	GK5 TIGAR PGM2L1 PPP1R3B SLC35B4
GO:0050663	cytokine secretion	biological_process	5	HMGB1 NLRP12 BTN3A2 F2R TLR10
GO:0000166	nucleotide binding	molecular_function	39	AXL SPATA5 GBP4 RAB21 CAMK1D ME2 EEF2K AK3 KIF3A NMNAT1 NUAK2 RAB27A MTG2 LSG1 SMG1 RAB3B ARFIP2 GRK3 ABL2 ZRANB3 NOL9 PNPO RTCA GK5 PTK6 KIF18B CYB5R3 CAMK2G DGKH UBE2G2 ALDH1B1 ACSL6 JAK3 IRGQ NLRP12 TUBD1 KIF1C AK1 BRIP1
GO:0017144	drug metabolic process	biological_process	11	QPRT IDO1 PNPO DSEL GAMT PIPOX ECE1 ALDH1B1 MRI1 AK1 AK3
GO:0007249	I-kappaB kinase/NF-kappaB signaling	biological_process	5	PLEKHG5 TRAF3IP2 NLRP12 F2R REL
GO:0006935	chemotaxis	biological_process	12	KIF3A SEMA3E CCR6 ISPD CCL5 FZD3 CCL22 DPYSL5 CAMK1D SEMA4F PLEKHG5 HMGB1
GO:0006366	transcription by RNA polymerase II	biological_process	50	TAF8 ARGFX REL FOXK1 ZNF554 ZNF655 TMF1 IKZF3 ZNF793 ZNF454 ZFP82 ZNF543 ZNF514 SPIB MDM4 CRX ZHX3 THAP5 IRF1 RLIM SMAD9 ZNF490 CIAO1 ATF6 LSM11 ZNF124 HMGB1 ZNF91 ELMSAN1 KPNA6 XIAP HOMEZ ZNF426 RNF14 ARNTL2 GTF2H5 ZNF530 TOX4 TCF7 TERF2 CBX5 ZNF451 ZNF114 ZNF805 ZKSCAN1 ZNF665 ZNF529 TADA3 ZNF652 BRIP1
GO:0016050	vesicle organization	biological_process	6	F2R TMF1 SNAP29 RAB27A HOOK3 GOLGA2
GO:0060326	cell chemotaxis	biological_process	6	CCR6 CCL22 CCL5 PLEKHG5 HMGB1 CAMK1D
GO:0045121	membrane raft	cellular_component	6	OPRM1 SLC6A4 F2R SPRED1 AKAP5 PAG1
GO:0006259	DNA metabolic process	biological_process	17	TERF2 POLH HMGB1 ZNF91 DTX3L TIGAR FBXO6 GTF2H5 ZRANB3 TCF7 NMNAT1 APOBEC3A BRIP1 DFFA SMG1 CCR6 TONSL
GO:0098857	membrane microdomain	cellular_component	6	AKAP5 SPRED1 F2R SLC6A4 OPRM1 PAG1
GO:0019216	regulation of lipid metabolic process	biological_process	7	RUBCN ATG14 PDP2 CYP51A1 LDLR MTMR9 CPT1A
GO:0008219	cell death	biological_process	42	RNF41 IKZF3 TMF1 NMNAT1 DFFA ZMAT3 PLEKHG5 CAMK1D EEF2K GSDMB AXL PGAM5 REL IFIT3 GCLM DSG3 CHP1 SERPINB9 MDM4 PNMA2 F2R DSG2 IDO1 GSDMA FZD3 NUAK2 RNF157 XIAP TNFAIP8L1 HMGB1 ATF6 GPI TIGAR IRF1 TRAF3IP2 ACER3 CCL5 KREMEN1 NLRP12 JAK3 HIP1 TCF7
GO:0015893	drug transport	biological_process	4	RAB3B SLC25A15 SFXN1 SLC31A1
GO:0002221	pattern recognition receptor signaling pathway	biological_process	4	TLR10 XIAP IRF1 HMGB1
GO:0046914	transition metal ion binding	molecular_function	20	ZNF91 TRIM65 TRIM58 LIMS1 ERAP2 TRIM52 RNF41 ZMAT3 AGMO GALNT4 MDM4 CYP51A1 XPNPEP3 APOBEC3A CYP8B1 MEFV DNAJC21 ABL2 ECE1 TRIM45
GO:0043005	neuron projection	cellular_component	23	PDE6A RBM3 RAB21 DPYSL5 EEF2K AP3S2 FAM161A GPI CAMK2G ORAI2 KIF3A GRM6 PLXDC1 SLC6A4 OPRM1 FZD3 RAB27A CABP4 TERF2 KIF1C TBC1D24 AKAP5 SLC4A8
GO:0032984	protein-containing complex disassembly	biological_process	6	MRPL30 SNAP29 KIF18B LIX1L ATG14 RUBCN
GO:0097159	organic cyclic compound binding	molecular_function	111	SMG1 ZBP1 RPL36A AKR1D1 THAP5 ARFIP2 ABL2 SUGP2 RAB27A ZNF514 MTG2 LSG1 AK3 DTD2 NMNAT1 RBM43 AXL ARGFX SPATA5 FOXK1 RBM3 ISG20L2 KIF1C CYP8B1 BRIP1 ZNF652 JAK3 ACSL6 IRGQ TSNAX ZNF451 TUBD1 DBT RRP7A HOMEZ CAMK2G UBE2G2 ZNF426 ZRANB3 IRF1 NOL9 PNPO ZNF490 LSM11 HMGB1 ZNF91 CYB5R3 L1TD1 DIS3L ZHX3 APOBEC3A RAB3B GRK3 DNAJC21 ZNF454 IDO1 ZNF543 ZFP82 SPATS2L NUAK2 SPIB SNTB2 CRX ZMAT3 KIF3A ZNF554…
GO:0002443	leukocyte mediated immunity	biological_process	18	CCR6 BTN3A2 TSPAN14 PIGR ARHGAP45 LILRB3 ITGAX JAK3 RAB27A LYZ HMGB1 SERPINB9 MICB SCAMP1 SNAP29 CD84 CYB5R3 GPI
GO:0001894	tissue homeostasis	biological_process	4	VSIG1 LYZ PIGR F2R
GO:0016324	apical plasma membrane	cellular_component	6	DSG2 SLC26A4 FZD3 SLC14A2 RAB27A SHROOM1
GO:0007265	Ras protein signal transduction	biological_process	8	PLEKHG5 RASGRP4 RAB21 F2R RAB3B ABL2 PHACTR4 RAB27A
GO:0097367	carbohydrate derivative binding	molecular_function	40	RAB27A NUAK2 LSG1 MTG2 GLTP SMG1 RAB3B GRK3 ARFIP2 ABL2 SPATA5 GBP4 AXL EEF2K CAMK1D RAB21 AK3 KIF3A NMNAT1 IRGQ JAK3 ACSL6 TUBD1 NLRP12 ST8SIA4 KIF1C AK1 BRIP1 RTCA ZRANB3 NOL9 PNPO KIF18B CYB5R3 GK5 HMGB1 PTK6 CAMK2G DGKH UBE2G2
GO:0061564	axon development	biological_process	9	SCARF1 SEMA4F DPYSL5 RAB21 ISPD KREMEN1 KIF3A FZD3 SEMA3E
GO:0031503	protein-containing complex localization	biological_process	5	HIP1 KIF3A SMG1 CLUAP1 TERF2
GO:0010008	endosome membrane	cellular_component	11	ECE1 SLC6A4 PLEKHB2 LDLR DTX3L SCAMP1 RAB21 KIAA1324 RAB27A ATP6V0A2 VPS53
GO:0051050	positive regulation of transport	biological_process	18	TMF1 LRAT CCL5 SLC6A4 RAB3B CHP1 GRM6 HMGB1 NLRP12 RAB21 EEF2K F2R CAMK1D GPI AXL GIPR HIP1 RAB27A
GO:0036094	small molecule binding	molecular_function	45	ABL2 ARFIP2 GRK3 RAB3B LRAT SMG1 LSG1 MTG2 NUAK2 RAB27A NMNAT1 KIF3A AK3 EEF2K ME2 CAMK1D RAB21 GBP4 SPTLC2 SPATA5 AXL BRIP1 CYP8B1 ST8SIA4 AK1 KIF1C TUBD1 DBT NLRP12 IRGQ JAK3 ACSL6 ALDH1B1 UBE2G2 DGKH CAMK2G GPI CYB5R3 KIF18B PTK6 GK5 RTCA PNPO NOL9 ZRANB3
GO:0051020	GTPase binding	molecular_function	10	RASGRP4 PLEKHG5 SGSM1 RUNDC1 TBC1D15 RNF41 SLC6A4 ARFIP2 KIF3A ATG14
GO:0036294	cellular response to decreased oxygen levels	biological_process	4	EEF2K BRIP1 TIGAR MDM4
GO:0120035	regulation of plasma membrane bounded cell projection organization	biological_process	12	TBC1D24 SEMA3E ABL2 RNF157 TBC1D15 CAMK1D EEF2K SCARF1 SEMA4F KREMEN1 RAB21 PTK6
GO:0030099	myeloid cell differentiation	biological_process	8	RBBP5 RASGRP4 RNF41 TRIM58 SFXN1 LILRB3 JAK3 CD109
GO:0002460	adaptive immune response based on somatic recombination of immune receptors built from immunoglobulin superfamily domains	biological_process	6	MICB HMGB1 BTN3A2 CCR6 JAK3 RAB27A
GO:0034976	response to endoplasmic reticulum stress	biological_process	5	SGTB UGGT1 ATF6 UBE2G2 FBXO6
GO:0016358	dendrite development	biological_process	4	RAB21 SCARF1 CAMK1D EEF2K
GO:0043603	cellular amide metabolic process	biological_process	21	SPPL3 ERAP2 CLN8 PIPOX SPTLC2 RBM3 MRPL30 FUT3 TIGAR EEF2K ST8SIA4 RPL36A PDP2 GCLM CCL5 ACER3 MTFMT ECE1 ACSL6 SLC25A15 MTG2
GO:0006464	cellular protein modification process	biological_process	73	SPPL3 PPP1R3B NMNAT1 FBXL18 RNF41 DCAF10 AXL DTX3L FOXK1 ZDHHC3 MEAF6 FUT2 PPIL6 SMG1 ATG14 ISPD ABL2 FBXO6 PEX13 MDM4 CAMK2G PHACTR4 APOL1 METTL21A NMT2 UBE2G2 OPRM1 RNF157 CCL22 MGAT4A FBXL20 RASGRP4 HMGB1 TRIM58 FAM161A ST8SIA4 PDP2 CCL5 JAK3 KDELC2 PIGX ZNF451 WDR45 DCAF16 UBOX5 PGAM5 FUT3 CAMK1D EEF2K CHP1 GOLGA2 GRK3 SPRED1 RAB3B CD109 NUAK2 GALNT4 F2R XIAP RNF14 RLIM GALNT15 PTK6 RBBP5 P3H…
GO:0036211	protein modification process	biological_process	73	PIGC DCAF7 RBBP5 P3H4 MTFMT TADA3 GTF2H5 POFUT1 NLRP12 UGGT1 XIAP RNF14 RLIM GALNT15 PTK6 CHP1 GOLGA2 RAB3B SPRED1 GRK3 CD109 NUAK2 GALNT4 F2R WDR45 UBOX5 DCAF16 PGAM5 FUT3 CAMK1D EEF2K PDP2 ST8SIA4 CCL5 JAK3 PIGX KDELC2 ZNF451 CAMK2G APOL1 PHACTR4 UBE2G2 NMT2 METTL21A RNF157 OPRM1 CCL22 HMGB1 RASGRP4 FBXL20 MGAT4A FAM161A TRIM58 PPIL6 SMG1 ATG14 ISPD ABL2 PEX13 FBXO6 MDM4 PPP1R3B SPPL3 RNF41 DCA…
GO:0010721	negative regulation of cell development	biological_process	6	SEMA3E HOOK3 SLC6A4 SEMA4F LDLR KREMEN1
GO:0006816	calcium ion transport	biological_process	8	CAMK2G ORAI2 GRM6 LETM1 CCL5 OPRM1 CD84 F2R
GO:0050790	regulation of catalytic activity	biological_process	42	XIAP PHACTR4 METTL21A CCL22 RUBCN PTK6 RASGRP4 HMGB1 GPI ARHGAP26 TIGAR TBC1D24 PDP2 CCL5 MEFV AKAP5 MTMR9 PPP1R12B RUNDC1 TBC1D15 ARHGAP45 DCP1A HIP1 NLRP12 TERF2 SGSM1 PPP1R3B DFFA PGAM5 DTX3L LIMS1 GOLGA2 CHP1 ATG14 GCLM ABL2 TOR1AIP2 SPRED1 GIPR CD109 SERPINB9 F2R
GO:0051960	regulation of nervous system development	biological_process	16	FZD3 SEMA4F LDLR CRX SCARF1 EEF2K CAMK1D PTK6 RAB21 KREMEN1 SEMA3E HOOK3 OPRM1 RNF157 ABL2 SLC6A4
GO:0051707	response to other organism	biological_process	18	SERPINB9 MICB DTX3L HMGB1 F2R IDO1 AXL IRF1 LYZ CCL22 APOBEC3A LRAT CCL5 TRAF3IP2 IKZF3 IFIT3 TMF1 OPRM1
GO:0034641	cellular nitrogen compound metabolic process	biological_process	120	CHP1 APOBEC3A ZHX3 GCLM DIS3L GDPD1 ZFP82 SLC25A15 ZNF543 IDO1 ZNF454 CRX F2R SPIB ZNF554 SBNO1 ZNF655 ZNF793 IKZF3 TMF1 REL SPTLC2 PNPT1 TAF8 LIMS1 PDE4C CAMK1D EEF2K FUT3 ZKSCAN1 AK1 ZNF114 RBMS2 ZNF805 ZNF529 MTFMT TADA3 ZNF665 TOX4 ZNF530 TCF7 GTF2H5 UGGT1 TRMT2B POFUT1 NLRP12 TERF2 BCDIN3D XIAP CLN8 ARNTL2 OR7D2 ERAP2 RNF14 RBM41 RTCA SMAD9 RLIM GPI ELMSAN1 TIGAR ADAT1 ATF6 POLH ZNF124 MRPL3…
GO:0006357	regulation of transcription by RNA polymerase II	biological_process	47	ELMSAN1 KPNA6 ATF6 ZNF91 HMGB1 ZNF124 ZNF490 CIAO1 RLIM SMAD9 IRF1 ARNTL2 ZNF426 RNF14 XIAP HOMEZ CBX5 ZNF451 TERF2 TOX4 ZNF530 TCF7 GTF2H5 ZNF529 ZNF652 BRIP1 TADA3 ZNF665 ZKSCAN1 ZNF114 ZNF805 FOXK1 REL ARGFX ZNF655 ZNF793 IKZF3 ZNF554 CRX SPIB ZNF514 MDM4 ZFP82 ZNF543 ZNF454 ZHX3 THAP5
GO:0031981	nuclear lumen	cellular_component	80	MRI1 SMG1 SUGP2 MDM4 PNMA2 LSG1 NUDC FAM9B DCAF10 NMNAT1 DFFA UBN2 DTX3L FOXK1 RBM3 ISG20L2 MEAF6 BRIP1 PPP1R12B FBLIM1 MOB1A SNAP29 ZNF451 CBX5 TUBD1 CAMK2G RRP7A HOMEZ TONSL ANKRD12 TRIM52 METTL21A C4ORF19 ZRANB3 IRF1 NOL9 PNPO RUBCN HMGB1 TRIM65 LSM11 KPNA6 TRIM45 DIS3L ZHX3 DNAJC21 SPATS2L DCTN5 SERPINB9 ZMAT3 ZNF554 IKZF3 ZNF655 UBOX5 DCAF16 TAF8 REL DCAF7 RBBP5 P3H4 TADA3 GTF2H5 TCF7 TOX4 T…
GO:0016298	lipase activity	molecular_function	4	ABL2 RASGRP4 GDPD1 CCL5
GO:0043207	response to external biotic stimulus	biological_process	18	F2R DTX3L MICB SERPINB9 HMGB1 CCL22 LYZ IDO1 IRF1 AXL OPRM1 TRAF3IP2 IKZF3 TMF1 IFIT3 APOBEC3A CCL5 LRAT
GO:0001667	ameboidal-type cell migration	biological_process	8	SPRED1 GPI SEMA4F PLEKHG5 HMGB1 PHACTR4 SEMA3E CCR6
GO:0031982	vesicle	cellular_component	71	MOB1A SNAP29 QPRT UGGT1 SGSM1 JAK3 ARHGAP45 HIP1 C17ORF75 SVOP MEFV PLEKHB2 PIGR ECE1 TBC1D24 ZNF114 AK1 SCAMP1 MGAT4A HMGB1 CYB5R3 GPI AP3S2 RUBCN GALNT15 SLC31A1 TSPAN14 OPRM1 VPS53 CAMK2G CD82 DGKH KIAA1324 GALNT4 SERPINB9 SCARF1 DSG2 F2R SNTB2 LILRB3 ITGAX CD109 RAB27A LRAT SLC26A4 AP4S1 DSG3 RAB3B SPRED1 CHP1 GOLGA2 GPR155 ATP6V0A2 ATG14 ENTPD4 COPA RAB21 HEATR5A AP1S3 PLEKHG5 DTX3L FUT3 LDL…
GO:0050878	regulation of body fluid levels	biological_process	9	AK3 COPA RAB27A DGKH IRF1 AXL F2R GPI CBX5
GO:0006470	protein dephosphorylation	biological_process	6	PGAM5 SPPL3 CAMK2G PPP1R3B PHACTR4 PDP2
GO:0070661	leukocyte proliferation	biological_process	6	CCL5 IKZF3 HMGB1 JAK3 IDO1 IRF1
GO:0006508	proteolysis	biological_process	32	TRIM58 GPI FOXK1 HMGB1 DTX3L FBXL20 RLIM PGPEP1 NRIP3 CLN8 RNF14 TMF1 UBE2G2 RNF41 FBXL18 ERAP2 SPPL3 XIAP F2R UGGT1 SGTB SERPINB9 MDM4 DESI1 NLRP12 HIP1 XPNPEP3 CD109 FBXO6 TADA3 ECE1 MEFV
GO:0006520	cellular amino acid metabolic process	biological_process	7	IDO1 MRI1 GAMT NMNAT1 GCLM PIPOX DBT
GO:0031344	regulation of cell projection organization	biological_process	12	RNF157 ABL2 SEMA3E TBC1D24 EEF2K CAMK1D SEMA4F SCARF1 KREMEN1 PTK6 RAB21 TBC1D15
GO:0050727	regulation of inflammatory response	biological_process	7	NLRP12 CCL5 MEFV LDLR XIAP IDO1 TLR10
GO:0071346	cellular response to interferon-gamma	biological_process	5	CAMK2G IRF1 CCL5 GBP4 CCL22
GO:0051056	regulation of small GTPase mediated signal transduction	biological_process	6	ARHGAP45 F2R ARHGAP26 ABL2 RASGRP4 PLEKHG5
GO:0006936	muscle contraction	biological_process	6	KCNJ5 F2R DSG2 PPP1R12B TPM3 GAMT
GO:0044265	cellular macromolecule catabolic process	biological_process	21	FBXL20 HMGB1 DTX3L LDLR TRIM58 RLIM PNPT1 NMNAT1 FBXL18 UBE2G2 RNF41 RNF14 TMF1 DFFA SGTB UGGT1 FBXO6 DCP1A DIS3L SMG1 RPL36A
GO:0045177	apical part of cell	cellular_component	7	SLC26A4 LDLR DSG2 SHROOM1 RAB27A SLC14A2 FZD3
GO:0000228	nuclear chromosome	cellular_component	11	TONSL FAM9B P3H4 DFFA IRF1 ZRANB3 TCF7 TOX4 HMGB1 TERF2 CBX5
GO:0042326	negative regulation of phosphorylation	biological_process	8	ATG14 RUBCN CHP1 CD109 TIGAR SPRED1 NLRP12 PTK6
GO:0019898	extrinsic component of membrane	cellular_component	5	ATG14 WDR45 HIP1 PTK6 NMT2
GO:0016604	nuclear body	cellular_component	15	TCF7 SUGP2 CBX5 ZNF106 KIF18B LSG1 ZNF451 PTK6 TERF2 LSM11 TONSL UBOX5 NMNAT1 TRIM52 DCAF7
GO:0048588	developmental cell growth	biological_process	4	SEMA4F RNF157 RAB21 SEMA3E
GO:1903706	regulation of hemopoiesis	biological_process	9	TRIM58 RBBP5 IKZF3 HMGB1 RNF41 LILRB3 JAK3 IRF1 AXL
GO:0003712	transcription coregulator activity	molecular_function	10	RLIM ZNF451 HMGB1 ATF6 HOMEZ TONSL TADA3 TMF1 RNF14 ZHX3
GO:0010942	positive regulation of cell death	biological_process	13	F2R CAMK1D TIGAR PNMA2 HMGB1 PLEKHG5 ATF6 NLRP12 HIP1 IDO1 DFFA CCL5 ZMAT3
GO:0051047	positive regulation of secretion	biological_process	8	RAB27A GIPR F2R SLC6A4 GPI HMGB1 TMF1 NLRP12
GO:0050865	regulation of cell activation	biological_process	11	JAK3 AXL IRF1 IDO1 HMGB1 LDLR CD84 PAG1 CCL5 RNF41 IKZF3
GO:0045732	positive regulation of protein catabolic process	biological_process	4	NKD1 RNF41 RNF14 LDLR
GO:0080135	regulation of cellular response to stress	biological_process	14	CAMK2G SMG1 SPRED1 OPRM1 UBE2G2 PNPT1 SCARF1 TIGAR DTX3L KREMEN1 HMGB1 POLH TERF2 ATF6
GO:0042254	ribosome biogenesis	biological_process	5	MTG2 ISG20L2 RRP7A GTF2H5 NOL9
GO:0008654	phospholipid biosynthetic process	biological_process	5	PIGX PIGC MTMR9 MBOAT1 SPTLC2
GO:0016020	membrane	cellular_component	170	PLEKHG5 GOLGA8H ZDHHC3 AXL TLR10 TMEM213 BTN3A2 GOLGA8R CCR6 GOLGA8O LSG1 REEP3 GSDMA LILRB3 FZD3 LRAT KCNA7 DSG3 HOOK3 ENTPD4 ATG14 CHST6 GOLGA8N RASGRP4 VSTM4 MGAT4A MBOAT1 PSTPIP2 AP5B1 NOL9 PDE6A NMT2 OPRM1 TSPAN14 ORAI2 VPS53 SFXN1 SNAP29 SGSM1 DCP1A JAK3 CYP8B1 SLC4A8 FMN1 PLEKHB2 NKD1 LIMS1 GSDMB PNPT1 GOLGA6C IKZF3 SLC6A4 ZMAT3 MS4A10 PCDH11Y GALNT4 SNTB2 F2R CD109 GDPD1 DIS3L RAB3B GRK3 …
GO:0034774	secretory granule lumen	cellular_component	6	ARHGAP45 RAB27A LYZ HMGB1 CYB5R3 GPI
GO:0009987	cellular process	biological_process	292	FZD3 GSDMA SUGP2 LILRB3 FBXO6 NUDC MDM4 GOLGA8O ENTPD4 GOLGA8N CHST6 MRI1 HOOK3 ISPD TLR10 ZDHHC3 GOLGA8H GOLGA8R CCR6 BTN3A2 C17ORF75 DCP1A CBX5 DBT QPRT SNAP29 PDP2 SLC4A8 PLEKHB2 FMN1 GAMT PSTPIP2 NOL9 ZNF91 PHACTR4 CRX GALNT4 GAS2L3 RAB3B DIS3L GDPD1 APOBEC3A ZHX3 GOLGA6C REL LIMS1 ZMAT3 KIF3A IKZF3 HIP1 TOX4 POFUT1 BCDIN3D MTFMT ZNF529 MEFV SHROOM1 KIF18B AP3S2 TIGAR GK5 PTK6 DGKH ARNTL2 OR7…
GO:0099503	secretory vesicle	cellular_component	18	GPI CYB5R3 HMGB1 SCAMP1 SNAP29 RAB27A LYZ CD109 ARHGAP45 LILRB3 ITGAX RAB3B ECE1 TSPAN14 PIGR ICA1L SVOP ATP6V0A2
GO:0043269	regulation of ion transport	biological_process	12	KCNJ5 CCL5 OPRM1 RAB3B KCNA7 SLC6A4 CHP1 CAMK2G GRM6 CD84 F2R KCNH6
GO:0055082	cellular chemical homeostasis	biological_process	14	SLC4A8 ABL2 GCLM CCL5 LETM1 SLC31A1 ATP6V0A2 CHP1 CCR6 SPPL3 F2R HMGB1 PDE6A GIPR
GO:0031647	regulation of protein stability	biological_process	5	MTMR9 TADA3 MDM4 HIP1 CHP1
GO:0120025	plasma membrane bounded cell projection	cellular_component	36	PTK6 DPYSL5 GPI FAM161A AP3S2 PDE6A CLUAP1 OPRM1 ORAI2 CAMK2G PHACTR4 GRM6 CABP4 TERF2 SNAP29 TUBD1 ARHGAP45 MEFV AKAP5 SLC4A8 KIF1C TBC1D24 PLEKHG5 RBM3 RAB21 PDE4C EEF2K PLXDC1 SLC6A4 CCR6 KIF3A FZD3 RAB27A SLC26A4 ARFIP2 ATG14
GO:0015075	ion transmembrane transporter activity	molecular_function	19	KCNH6 SLC35B4 LETM1 SLC31A1 KCNJ5 OPRM1 SLC6A4 SFXN1 ORAI2 APOL1 SLC43A2 CLCC1 SLC12A6 SLC25A15 SLC26A4 SLC4A8 KCNA7 CHP1 ATP6V0A2
GO:0060205	cytoplasmic vesicle lumen	cellular_component	6	HMGB1 CYB5R3 GPI ARHGAP45 RAB27A LYZ
GO:0005759	mitochondrial matrix	cellular_component	8	DBT ME2 ALDH1B1 MTG2 MRPL30 LYRM7 AK3 PDP2
GO:0030133	transport vesicle	cellular_component	8	SNTB2 RAB3B SVOP SCAMP1 RAB27A COPA GALNT15 CHP1
GO:0050714	positive regulation of protein secretion	biological_process	5	F2R GPI HMGB1 GIPR NLRP12
GO:0050900	leukocyte migration	biological_process	8	CAMK1D CD84 HMGB1 NLRP12 CCL5 CCL22 ITGAX CCR6
GO:0009410	response to xenobiotic stimulus	biological_process	5	APOBEC3A GPI CYB5R3 TIGAR OPRM1
GO:0048699	generation of neurons	biological_process	26	ACSL6 PEX13 FZD3 CABP4 KREMEN1 CRX SCARF1 HOOK3 TBC1D24 NKD1 ISPD ABL2 AXL PTK6 RAB21 HMGB1 SEMA4F LDLR EEF2K DPYSL5 CAMK1D SEMA3E KIF3A OPRM1 RNF157 SLC6A4
GO:0046649	lymphocyte activation	biological_process	13	MICB HMGB1 TCF7 RAB27A IRF1 AXL IDO1 JAK3 RNF41 IKZF3 CCL5 PAG1 CCR6
GO:0046034	ATP metabolic process	biological_process	5	TIGAR GPI NMNAT1 AK1 PGM2L1
GO:0010876	lipid localization	biological_process	7	GLTP APOL1 LRAT TMF1 CLN8 LDLR CPT1A
GO:0019438	aromatic compound biosynthetic process	biological_process	74	ZNF426 TRIM52 TONSL HOMEZ HMGB1 ZNF91 LSM11 KPNA6 PNPO IRF1 ZNF490 CIAO1 CCL5 ZNF652 BRIP1 PDP2 CBX5 QPRT ZNF451 ACSL6 NMNAT1 RNF41 AK3 DTX3L FOXK1 ARGFX THAP5 ENTPD4 ZNF514 MDM4 OR7D2 RNF14 ARNTL2 XIAP ATF6 POLH ZNF124 ELMSAN1 SMAD9 RLIM ZNF665 ZNF529 TADA3 ZNF114 AK1 ZNF805 ZKSCAN1 TERF2 POFUT1 NLRP12 GTF2H5 TOX4 ZNF530 TCF7 ZNF655 IKZF3 ZNF793 TMF1 ZNF554 SBNO1 LIMS1 CAMK1D PDE4C TAF8 REL ZHX3…
GO:0042995	cell projection	cellular_component	37	AKAP5 MEFV SLC4A8 KIF1C TBC1D24 CABP4 SNAP29 TERF2 TUBD1 ARHGAP45 CLUAP1 OPRM1 ORAI2 CAMK2G GRM6 PHACTR4 PTK6 DPYSL5 FAM161A AP3S2 GPI PDE6A SLC26A4 ARFIP2 MRI1 ATG14 FZD3 RAB27A PLXDC1 SLC6A4 CCR6 KIF3A RBM3 PLEKHG5 RAB21 EEF2K PDE4C
GO:0001654	eye development	biological_process	6	PHACTR4 PDE6A NKD1 RD3 ATF6 CABP4
GO:0004721	phosphoprotein phosphatase activity	molecular_function	5	PDP2 PHACTR4 CAMK2G PPP1R3B PGAM5
GO:0006355	regulation of transcription, DNA-templated	biological_process	61	ZNF530 TOX4 TCF7 GTF2H5 CBX5 ZNF451 POFUT1 NLRP12 TERF2 ZKSCAN1 ZNF114 ZNF805 ZNF529 ZNF652 BRIP1 TADA3 ZNF665 ZNF490 CIAO1 IRF1 RLIM SMAD9 ELMSAN1 KPNA6 ATF6 ZNF124 ZNF91 HMGB1 XIAP TONSL HOMEZ ARNTL2 ZNF426 OR7D2 TRIM52 RNF14 ZFP82 ZNF543 ZNF454 CRX F2R ZNF514 SPIB MDM4 CHP1 ZHX3 THAP5 REL TAF8 ARGFX LIMS1 CAMK1D FOXK1 DTX3L ZNF554 SBNO1 ZNF655 TMF1 RNF41 ZNF793 IKZF3
GO:0006915	apoptotic process	biological_process	35	NLRP12 PNMA2 MDM4 SERPINB9 KREMEN1 F2R JAK3 GSDMA IDO1 NUAK2 TCF7 HIP1 FZD3 CCL5 GCLM IFIT3 TRAF3IP2 ATF6 HMGB1 PLEKHG5 TIGAR GPI EEF2K CAMK1D AXL IRF1 NMNAT1 TMF1 RNF41 IKZF3 RNF157 DFFA XIAP TNFAIP8L1 ZMAT3
GO:0036477	somatodendritic compartment	cellular_component	14	OPRM1 SLC4A8 SLC31A1 AKAP5 PLXDC1 GRM6 KIF1C LDLR EEF2K DPYSL5 RBM3 KREMEN1 RAB27A FZD3
GO:0032496	response to lipopolysaccharide	biological_process	6	OPRM1 F2R CCL5 HMGB1 IDO1 AXL
GO:0150063	visual system development	biological_process	6	CABP4 ATF6 PHACTR4 PDE6A NKD1 RD3
GO:2001141	regulation of RNA biosynthetic process	biological_process	62	ZNF655 IKZF3 RNF41 ZNF793 TMF1 ZNF554 SBNO1 DTX3L FOXK1 LIMS1 CAMK1D TAF8 ARGFX REL ZHX3 THAP5 CHP1 SPIB ZNF514 MDM4 CRX F2R ZNF454 ZFP82 ZNF543 ZNF426 OR7D2 RNF14 TRIM52 ARNTL2 XIAP TONSL HOMEZ ATF6 HMGB1 ZNF91 ZNF124 ELMSAN1 KPNA6 SMAD9 RLIM IRF1 ZNF490 CIAO1 ZNF665 CCL5 ZNF529 TADA3 ZNF652 BRIP1 ZNF114 ZNF805 ZKSCAN1 TERF2 NLRP12 POFUT1 CBX5 ZNF451 GTF2H5 TOX4 ZNF530 TCF7
GO:0022604	regulation of cell morphogenesis	biological_process	8	STRIP2 SEMA3E FBLIM1 EEF2K SEMA4F LIMS1 RNF157 RAB21
GO:0030425	dendrite	cellular_component	10	FZD3 RAB27A RBM3 EEF2K DPYSL5 KIF1C GRM6 PLXDC1 AKAP5 OPRM1
GO:0051252	regulation of RNA metabolic process	biological_process	66	TONSL HOMEZ XIAP ARNTL2 TRIM52 RNF14 ZNF426 OR7D2 CIAO1 ZNF490 IRF1 SMAD9 RLIM KPNA6 ELMSAN1 ZNF124 ZNF91 HMGB1 ATF6 ZKSCAN1 ZNF805 ZNF114 ZNF652 BRIP1 TADA3 ZNF529 CCL5 ZNF665 TCF7 ZNF530 TOX4 DCP1A GTF2H5 ZNF451 CBX5 BCDIN3D NLRP12 POFUT1 TERF2 SBNO1 ZNF554 TMF1 RNF41 ZNF793 IKZF3 ZNF655 PNPT1 REL ARGFX TAF8 CAMK1D LIMS1 RBM3 FOXK1 DTX3L CHP1 THAP5 ZHX3 ZNF543 ZFP82 ZNF454 F2R CRX MDM4 ZNF514 S…
GO:0019882	antigen processing and presentation	biological_process	6	KIF3A DCTN5 RAB27A RAB3B ERAP2 AP1S3
GO:0097447	dendritic tree	cellular_component	10	EEF2K DPYSL5 RBM3 FZD3 RAB27A OPRM1 AKAP5 PLXDC1 GRM6 KIF1C
GO:0005524	ATP binding	molecular_function	26	GK5 PTK6 EEF2K KIF18B CAMK1D AXL ZRANB3 NOL9 SPATA5 RTCA UBE2G2 NMNAT1 CAMK2G DGKH AK3 KIF3A NLRP12 JAK3 ACSL6 NUAK2 BRIP1 GRK3 ABL2 KIF1C SMG1 AK1
GO:0031966	mitochondrial membrane	cellular_component	12	SFXN1 CPT1A UBIAD1 LETM1 SLC25A15 LYRM7 PGAM5 ACSL6 TIGAR CYB5R3 MRPL30 MTG2
GO:0030424	axon	cellular_component	10	FZD3 AP3S2 CABP4 RAB21 TERF2 KIF3A KIF1C ORAI2 TBC1D24 OPRM1
GO:0030162	regulation of proteolysis	biological_process	13	CD109 HIP1 NLRP12 SERPINB9 HMGB1 GPI F2R XIAP MEFV UBE2G2 TMF1 RNF14 CLN8
GO:0030554	adenyl nucleotide binding	molecular_function	27	NOL9 ZRANB3 AXL RTCA SPATA5 PTK6 GK5 CYB5R3 CAMK1D KIF18B EEF2K CAMK2G DGKH KIF3A AK3 NMNAT1 UBE2G2 ACSL6 JAK3 NUAK2 NLRP12 SMG1 AK1 KIF1C ABL2 GRK3 BRIP1
GO:0048878	chemical homeostasis	biological_process	20	F2R GIPR SLC12A6 GCLM CCL5 SLC26A4 ABL2 SLC4A8 CHP1 ATP6V0A2 HMGB1 GPI LDLR PDE6A SLC31A1 LETM1 SFXN1 XIAP SPPL3 CCR6
GO:0022857	transmembrane transporter activity	molecular_function	22	ATP6V0A2 CHP1 SLC4A8 KCNA7 SLC26A4 SVOP SLC12A6 SLC25A15 CLCC1 CABP4 SLC14A2 SLC43A2 APOL1 SFXN1 ORAI2 OPRM1 SLC6A4 KCNJ5 LETM1 SLC31A1 KCNH6 SLC35B4
GO:0005634	nucleus	cellular_component	133	CRX LPP SPIB SERPINB9 DCTN5 NUAK2 SPATS2L ZFP82 ZNF543 ZNF454 DNAJC21 SPRED1 APOBEC3A ZHX3 DIS3L TRIM45 CHP1 CAMK1D REL GBP4 PNPT1 TAF8 DCAF16 UBOX5 UBIAD1 ZNF655 ZNF793 IKZF3 TMF1 ZNF554 SBNO1 ZMAT3 CLCC1 DESI1 NLRP12 TERF2 BCDIN3D TOX4 ZNF530 HIP1 TCF7 GTF2H5 ZNF529 TADA3 RBBP5 P3H4 ZNF665 MEFV DCAF7 BIVM ZKSCAN1 ZNF114 RBMS2 ZNF805 GPI ELMSAN1 TIGAR COA7 KIF18B ZNF106 PTK6 ATF6 POLH ZNF124 RBM…
GO:0098772	molecular function regulator	molecular_function	32	DFFA PPP1R3B SEMA3E XIAP PHACTR4 RASGRP4 DTX3L PLEKHG5 HMGB1 SEMA4F ARHGAP26 GPI PGAM5 CCL22 CCL5 GCLM SPRED1 TOR1AIP2 MTMR9 PPP1R12B CHP1 TBC1D24 COPA SERPINB9 CABP4 NLRP12 SGSM1 DCP1A ARHGAP45 CD109 TBC1D15 RUNDC1
GO:0045202	synapse	cellular_component	20	CABP4 SNAP29 SNTB2 F2R HIP1 FZD3 RAB27A AKAP5 SVOP RAB3B TBC1D24 PLEKHG5 RAB21 SCAMP1 FBXL20 EEF2K SEMA4F SLC6A4 OPRM1 GRM6
GO:0019538	protein metabolic process	biological_process	100	ATG14 RPL36A PPIL6 SMG1 ABL2 ISPD FBXO6 PEX13 MTG2 MDM4 SPPL3 PPP1R3B PGPEP1 NMNAT1 FBXL18 RNF41 DCAF10 IDS LYZ AXL MEAF6 ZDHHC3 FUT2 PLEKHG5 DTX3L FOXK1 RBM3 ST8SIA4 PDP2 NKD1 ECE1 CCL5 JAK3 ZNF451 KDELC2 PIGX PHACTR4 APOL1 CAMK2G TSPAN14 NRIP3 RNF157 OPRM1 METTL21A UBE2G2 NMT2 CCL22 CIAO1 IRF1 FAM161A TRIM58 FBXL20 MGAT4A HMGB1 RASGRP4 GOLGA2 CHP1 RAB3B SPRED1 GRK3 NUAK2 XPNPEP3 CD109 F2R GALNT…
GO:0031175	neuron projection development	biological_process	16	RNF157 ABL2 ISPD KIF3A SEMA3E TBC1D24 EEF2K DPYSL5 CAMK1D SEMA4F SCARF1 KREMEN1 HMGB1 PTK6 RAB21 FZD3
GO:0000904	cell morphogenesis involved in differentiation	biological_process	12	AXL FZD3 RAB21 CABP4 LIMS1 SEMA4F DPYSL5 EEF2K SEMA3E KIF3A ISPD VSIG1
GO:1903506	regulation of nucleic acid-templated transcription	biological_process	61	ATF6 HMGB1 ZNF91 ZNF124 ELMSAN1 KPNA6 SMAD9 RLIM IRF1 ZNF490 CIAO1 OR7D2 ZNF426 RNF14 TRIM52 ARNTL2 XIAP HOMEZ TONSL TERF2 POFUT1 NLRP12 CBX5 ZNF451 GTF2H5 TOX4 ZNF530 TCF7 ZNF665 ZNF529 TADA3 BRIP1 ZNF652 ZNF114 ZNF805 ZKSCAN1 DTX3L FOXK1 LIMS1 CAMK1D TAF8 ARGFX REL ZNF655 IKZF3 ZNF793 RNF41 TMF1 ZNF554 SBNO1 SPIB ZNF514 MDM4 CRX F2R ZNF454 ZFP82 ZNF543 ZHX3 THAP5 CHP1
GO:0019725	cellular homeostasis	biological_process	16	SLC31A1 LETM1 GCLM CCL5 SLC4A8 ABL2 SPPL3 CHP1 CCR6 ATP6V0A2 HMGB1 TERF2 F2R GIPR PDE6A SLC12A6
GO:0006796	phosphate-containing compound metabolic process	biological_process	56	ABL2 GRK3 SPRED1 GDPD1 ATG14 ENTPD4 SMG1 CHP1 F2R NUAK2 CD109 IDO1 PIPOX NMNAT1 RNF41 AK3 SPPL3 PPP1R3B LDLR EEF2K CAMK1D PDE4C SPTLC2 PGAM5 AXL PPP1R12B MTMR9 TADA3 CCL5 PIGC PDP2 AK1 QPRT NLRP12 PIGX JAK3 GTF2H5 ACSL6 OPRM1 CLN8 PHACTR4 CAMK2G DGKH TIGAR MBOAT1 GPI SGPP2 PTK6 GK5 HMGB1 RASGRP4 RUBCN CCL22 NOL9 PNPO PGM2L1
GO:0006996	organelle organization	biological_process	65	PHACTR4 KIAA1324 SEMA3E GOLGA8M RRP7A LETM1 CLUAP1 LYRM7 RUBCN SHROOM1 ZRANB3 PSTPIP2 ARHGAP26 TIGAR FAM161A KIF18B HMGB1 SKA1 GOLGA8J TBC1D24 FMN1 BRIP1 TADA3 RBBP5 P3H4 HIP1 TBC1D15 GTF2H5 TUBD1 ZNF451 TERF2 SNAP29 GOLGA8K WDR45 KIF3A GOLGA8R PIPOX RNF41 TMF1 GOLGA6C PNPT1 TPM3 MEAF6 DTX3L GOLGA8H STRIP2 GOLGA8N ATP6V0A2 ATG14 CEP68 HOOK3 CHP1 GOLGA2 SMG1 GAS2L3 ABL2 TOR1AIP2 ARFIP2 GCLM NUAK2 …
GO:0006139	nucleobase-containing compound metabolic process	biological_process	104	ZNF124 POLH ATF6 TIGAR ADAT1 GPI ELMSAN1 SMAD9 RLIM RBM41 RTCA RNF14 OR7D2 ARNTL2 XIAP BCDIN3D POFUT1 NLRP12 TERF2 TRMT2B UGGT1 GTF2H5 TCF7 ZNF530 TOX4 ZNF665 TADA3 MTFMT ZNF529 ZNF805 RBMS2 AK1 ZNF114 ZKSCAN1 PDE4C CAMK1D LIMS1 TAF8 PNPT1 REL TMF1 ZNF793 IKZF3 ZNF655 SBNO1 ZNF554 SPIB F2R CRX IDO1 ZNF454 ZNF543 ZFP82 DIS3L ZHX3 APOBEC3A CHP1 LSM11 ZNF91 HMGB1 KPNA6 ZRANB3 IRF1 NOL9 PGM2L1 CIAO1 …
GO, Gene Ontology.
